# Supplementary material
Source: ML conference proceedings conference paper supplement (https://openreview.net/forum?id=tFeaLw9AWn)
Supplement: supplementary_material [file attachment]

---

# Single-Call Stochastic Extragradient Methods: Improved Analysis under Weaker Conditions

---

Anonymous Author(s)

Affiliation

Address

email

## Abstract

1 Single-call stochastic extragradient methods, like stochastic past extragradient  
2 (SPEG) and stochastic optimistic gradient (SOG), have gained a lot of interest in  
3 recent years and are one of the most efficient algorithms for solving large-scale min-  
4 max optimization and variational inequalities problems (VIP) appearing in various  
5 machine learning tasks. However, despite their undoubted popularity, current  
6 convergence analyses of SPEG and SOG require strong assumptions like bounded  
7 variance or growth conditions. In addition, several important questions regarding  
8 the convergence properties of these methods are still open, including mini-batching,  
9 efficient step-size selection, and convergence guarantees under different sampling  
10 strategies. In this work, we address these questions and provide convergence  
11 guarantees for two large classes of structured non-monotone VIPs: (i) quasi-  
12 strongly monotone problems (a generalization of strongly monotone problems) and  
13 (ii) weak Minty variational inequalities (a generalization of monotone and Minty  
14 VIPs). We introduce the expected residual condition, explain its benefits, and show  
15 how it allows us to obtain a strictly weaker bound than previously used growth  
16 conditions, expected co-coercivity, or bounded variance assumptions. Finally, our  
17 convergence analysis holds under the arbitrary sampling paradigm, which includes  
18 importance sampling and various mini-batching strategies as special cases.

## 19 1 Introduction

20 Differentiable game formulations where several parameterized models/players compete to minimize  
21 their respective objective functions have recently gained much attention from the machine learning  
22 community. Some landmark advances in machine learning that are framed as games (or in their  
23 simplified form as min-max optimization problems) are Generative Adversarial Networks (GANs) [19,  
24 2], adversarial training of neural networks [46, 72], reinforcement learning [9, 64], and distributionally  
25 robust learning [51, 73].

26 In this work, we consider a more abstract formulation of the problem and focus on solving the  
27 following unconstrained stochastic variational inequality problem (VIP):

$$\text{Find } x^* \in \mathbb{R}^d : \text{ such that } F(x^*) = \frac{1}{n} \sum_{i=1}^n F_i(x^*) = 0 \quad (1)$$

28 where each  $F_i : \mathbb{R}^d \rightarrow \mathbb{R}^d$  is a Lipschitz continuous operator. Problem (1) generalizes the solution of  
29 several types of *stochastic smooth games* [16, 44, 20, 7]. The simplest example is the unconstrained  
30 min-max optimization problem (also called a *zero-sum game*):

$$\min_{x_1 \in \mathbb{R}^{d_1}} \max_{x_2 \in \mathbb{R}^{d_2}} \frac{1}{n} \sum_{i=1}^n g_i(x_1, x_2), \quad (2)$$

31 where each component function  $g_i : \mathbb{R}^{d_1} \times \mathbb{R}^{d_2} \rightarrow \mathbb{R}$  is assumed to be smooth. In this scenario,  
32 operator  $F_i$  of (1) represents the appropriate concatenation of the block-gradients of  $g_i$ :  $F_i(x) :=$

( $\nabla_{x_1} g_i(x_1, x_2); -\nabla_{x_2} g_i(x_1, x_2)$ ), where  $x := (x_1; x_2)$ . Solving (1) then amounts to finding a stationary point  $x^* = (x_1^*; x_2^*)$  for (2), which under a convex-concavity assumption for  $g_i$ , implies that it is a global solution for the min-max problem.

However, in modern machine learning applications, game-theoretical formulations that are special cases of problem (1) are rarely monotone. That is, the min-max optimization problem (2) does not satisfy the popular and well-studied convex-concave setting. For this reason, the ML community started focusing on non-monotone problems with extra structural properties.<sup>1</sup> In this work, we focus on such settings (structured non-monotone operators) for which we are able to provide tight convergence guarantees and avoid the standard issues (like cycling and divergence of the methods) appearing in the more general non-monotone regime. In particular, we focus on understanding and efficiently analyze the performance of single-call extragradient methods for solving (i)  $\mu$ -quasi-strongly monotone VIPs [44, 6] and (ii) weak Minty variational inequalities [14, 33].

**Classes of structured non-monotone VIPs.** Throughout this work we assume that operator  $F$  in (1) is  $L$ -Lipschitz i.e.  $\forall x, y \in \mathbb{R}^d$  operator  $F$  satisfy  $\|F(x) - F(y)\| \leq L\|x - y\|$ .

As we have already mentioned, in this work, we deal with two classes of structured non-monotone problems: the  $\mu$ -quasi strongly monotone VIPs and the weak Minty variational inequalities.

**Definition 1.1.**  $F$  is said to be  $\mu$ -quasi strongly monotone if there is  $\mu > 0$  such that:

$$\forall x \in \mathbb{R}^d \quad \langle F(x), x - x^* \rangle \geq \mu \|x - x^*\|^2. \quad (3)$$

Condition (3) is a relaxation of  $\mu$ -strong monotonicity, and it includes several non-monotone games as special cases [44]. Inequality (3) can be seen as an extension of the popular quasi-strong convexity assumption from optimization literature [53, 25] to the VIPs [44]. In the literature of variational inequality problems, quasi strongly monotone problems are also known as strong coherent VIPs [66] or VIPs satisfying the strong stability condition [47], or strong Minty variational inequality [14].

One of the weakest possible assumptions on the structure of non-monotone VIPs is the weak Minty variational inequality [14].

**Definition 1.2.** We say weak Minty Variational Inequality (MVI) holds for  $F$  if for some  $\rho > 0$  :

$$\forall x \in \mathbb{R}^d \quad \langle F(x), x - x^* \rangle \geq -\rho \|F(x)\|^2. \quad (4)$$

To the best of our knowledge, the weak Minty variational inequality (4) as an assumption was first introduced in [14]. The more popular and extensively studied Minty variational inequality [12, 37, 38, 48] is a particular case of (4) with  $\rho = 0$ . In addition, the weak MVI condition is implied by the negative comonotonicity [4] or, equivalently, the positive cohypomonotonicity [11]. Finally, when we focus on min-max optimization problems (2), weak MVI condition (with  $\rho = 0$ ) is satisfied for several non-convex non-concave families of min-max objectives, including quasi-convex quasi-concave or star convex- star concave [20]. Extragradient-type methods for solving VIPs satisfying the weak MVI have been proposed in [14, 54] and [8].

## 1.1 Main Contributions

Our main contributions are summarized below.

- **Expected Residual.** We propose the expected residual (ER) condition for stochastic variational inequality problems (1). We explain the benefits of ER and show how it can be used to derive an upper bound on  $\mathbb{E}\|g(x)\|^2$  (see Lemma 3.2) that it is strictly weaker than the bounded variance assumption and “growth conditions” previously used for the analysis of stochastic algorithms for solving (1). We prove that ER holds for a large class of operators, i.e., whenever  $F_i$  of (1) are Lipschitz continuous.
- **Novel Convergence Guarantees.** We prove the first convergence guarantees for SPEG (7) in the quasi-strongly monotone (3) and weak MVI (4) cases *without using the bounded variance assumption*. We achieve that by using the proposed (ER) condition. In particular, for the class of quasi-strongly monotone VIPs, we show a linear convergence rate to a neighborhood of  $x^*$  when constant step-sizes are used. We also provide theoretically motivated step-size switching rules that

<sup>1</sup>The computation of approximate first-order locally optimal solutions for general non-monotone problems (without extra structure) is intractable. See [13] and [14] for more details.

**Table 1:** Summary of known and new convergence results for versions of SEG and SPEG with constant step-sizes applied to solve quasi-strongly monotone variational inequalities and variational inequalities with operators satisfying Weak Minty condition. Columns: “Setup” = quasi-strongly monotone or Weak MVI; “No UB?” = is the result derived without bounded variance assumption?; “Single-call” = does the method require one oracle call per iteration?; “Convergence rate” = rate of convergence neglecting numerical factors. Notation:  $K$  = number of iterations;  $L_{\max} = \max_{i \in [n]} L_i$ , where  $L_i$  is a Lipschitz constant of  $F_i$ ;  $\bar{\mu} = \frac{1}{n} \sum_{i=1}^n \mu_i$ , where  $\mu_i$  is quasi-strong monotonicity constant of  $F_i$  (see details in [20]);  $\sigma_{\text{US}}^2 = \frac{1}{n} \sum_{i=1}^n \|F_i(x^*)\|^2$ ;  $\bar{L} = \frac{1}{n} \sum_{i=1}^n L_i$ ;  $\sigma_{\text{IS}}^2 = \frac{1}{n} \sum_{i=1}^n \frac{\bar{L}}{L_i} \|F_i(x^*)\|^2$ ;  $L$  = Lipschitz constant of  $F$ ;  $\mu$  = quasi-strong monotonicity constant of  $F$ ;  $\delta, \sigma_*^2$  = parameters from (8);  $\rho$  = parameter from Weak Minty condition;  $\tau$  = batchsize.

| Setup                   | Method           | No UB?           | Single-call? | Convergence rate                                                                                                                                                                                                                                                                                             |
|-------------------------|------------------|------------------|--------------|--------------------------------------------------------------------------------------------------------------------------------------------------------------------------------------------------------------------------------------------------------------------------------------------------------------|
| Quasi-strong mon.       | S-SEG-US [20]    | ✓ <sup>(1)</sup> | ✗            | $\frac{L_{\max}}{\bar{\mu}} \exp\left(-\frac{\bar{\mu}}{L_{\max}} K\right) + \frac{\sigma_{\text{US}}^2}{\bar{\mu}^2 K}$                                                                                                                                                                                     |
|                         | S-SEG-IS [20]    | ✓ <sup>(1)</sup> | ✗            | $\frac{\bar{L}}{\bar{\mu}} \exp\left(-\frac{\bar{\mu}}{\bar{L}} K\right) + \frac{\sigma_{\text{IS}}^2}{\bar{\mu}^2 K}$                                                                                                                                                                                       |
|                         | SPEG [28]        | ✗ <sup>(2)</sup> | ✓            | $\frac{L}{\mu} \exp\left(-\frac{\mu}{L} K\right) + \frac{\sigma_*^2}{\mu^2 K}$ <sup>(3)</sup>                                                                                                                                                                                                                |
|                         | SPEG (This work) | ✓                | ✓            | $\max\left\{\frac{L}{\mu}, \frac{\delta}{\mu^2}\right\} \exp\left(-\min\left\{\frac{\mu}{L}, \frac{\mu^2}{\delta}\right\} K\right) + \frac{\sigma_*^2}{\mu^2 K}$                                                                                                                                             |
| Weak MVI <sup>(4)</sup> | SEG+ [14]        | ✗ <sup>(2)</sup> | ✗            | $\frac{L^2 \ x_0 - x^*\ ^2}{K(1-8\sqrt{2}L\rho)} + \frac{\sigma_*^2}{\tau(1-8\sqrt{2}L\rho)}$ <sup>(5)</sup>                                                                                                                                                                                                 |
|                         | OGDA+ [8]        | ✗ <sup>(2)</sup> | ✓            | $\frac{\ x_0 - x^*\ ^2}{Kac(a-\rho)} + \frac{\sigma_*^2}{\tau L^2 ac(a-\rho)}$ <sup>(6)</sup>                                                                                                                                                                                                                |
|                         | SPEG (This work) | ✓                | ✓            | $\frac{\left(1 + \frac{48\omega\gamma\delta}{\tau(1-L\gamma)^2}\right)^K \ x_0 - x^*\ ^2}{K\omega\gamma(1-L(\gamma+4\omega))} + \frac{\left(1 + \frac{1-L\gamma}{K}\left(1 + \frac{48\omega\gamma\delta}{\tau(1-L\gamma)^2}\right)^K\right)\sigma_*^2}{\tau(1-L\gamma)(1-L(\gamma+4\omega))}$ <sup>(7)</sup> |

<sup>(1)</sup> Quasi-strong monotonicity of all  $F_i$  is assumed.

<sup>(2)</sup> It is assumed that (8) holds with  $\delta = 0$ .

<sup>(3)</sup> [28] do not derive this result but it can be obtained from their proof using standard choice of step-sizes.

<sup>(4)</sup> All mentioned results in this case require large batchsizes  $\tau = \mathcal{O}(K)$  to get  $\mathcal{O}(1/K)$  rate.

<sup>(5)</sup> The result is derived for  $\rho < 1/8\sqrt{2}L$ .

<sup>(6)</sup> The result is derived for  $\rho < 3/8L$ . Here  $a$  and  $c$  are assumed to satisfy  $aL \leq \frac{7-\sqrt{1+48c^2}}{8(1+c)}$ ,  $c > 0$  and  $a > \rho$ .

<sup>(7)</sup> The result is derived for  $\rho < 1/2L$ . Here we assume that  $\max\{2\rho, 1/(2L)\} < \gamma < 1/L$  and  $0 < \omega < \min\{\gamma - 2\rho, (4-\gamma L)/4L\}$ .

77 guarantee exact convergence of SPEG to  $x^*$ . In the weak MVI case, we prove the convergence  
78 of SPEG for  $\rho < 1/2L$ , improving the existing restrictions on  $\rho$ . We compare our results with the  
79 existing literature in Table 1.

80 • **Arbitrary Sampling.** Via a stochastic reformulation of the variational inequality problem (1) we  
81 explain how our convergence guarantees of SPEG hold under the arbitrary sampling paradigm.  
82 This allows us to cover a wide range of samplings for SPEG that were never considered in the  
83 literature before, including mini-batching, uniform sampling, and importance sampling as special  
84 cases. In this sense, our analysis of SPEG is unified for different sampling strategies. Finally, to  
85 highlight the tightness of our analysis, we show that the best-known convergence guarantees of  
86 deterministic PEG for strongly monotone and weak MVI can be obtained as special cases of our  
87 main theorems.

## 88 2 Stochastic Reformulation of VIPs & Single-Call Extragradient Methods

89 In this work, we provide a theoretical analysis of single-call stochastic extragradient methods that  
90 allows us to obtain convergence guarantees of any minibatch and reasonable sampling selection. We  
91 achieve that by using the recently proposed “stochastic reformulation” of the variational inequality  
92 problem (1) from [44]. That is, to allow for any form of minibatching, we use the *arbitrary sampling*  
93 notation

$$g(x) = F_v(x) := \frac{1}{n} \sum_{i=1}^n v_i F_i(x), \quad (5)$$

94 where  $v \in \mathbb{R}_+^n$  is a random *sampling vector* drawn from a user-defined distribution  $\mathcal{D}$  such that  
95  $\mathbb{E}_{\mathcal{D}}[v_i] = 1$ , for  $i = 1, \dots, n$ . In this setting, the original problem (1) can be equivalently written as,

$$\text{Find } x^* \in \mathbb{R}^d : \mathbb{E}_{\mathcal{D}} \left[ F_v(x^*) := \frac{1}{n} \sum_{i=1}^n v_i F_i(x^*) \right] = 0, \quad (6)$$

96 where the equivalence trivially holds since  $\mathbb{E}_{\mathcal{D}}[F_v(x)] = \frac{1}{n} \sum_{i=1}^n \mathbb{E}_{\mathcal{D}}[v_i] F_i(x) = F(x)$ .

97 In this work, we consider *Stochastic Past Extragradient Method* (SPEG) applied to (6):

$$\begin{aligned} \hat{x}_k &= x_k - \gamma_k F_{v_{k-1}}(\hat{x}_{k-1}) \\ x_{k+1} &= x_k - \omega_k F_{v_k}(\hat{x}_k) \end{aligned} \quad (7)$$

98 where  $\hat{x}_{-1} = x_0$  and  $v^k \sim \mathcal{D}$  is sampled i.i.d at each iteration and  $\gamma_k > 0$  and  $\omega_k > 0$  are the  
99 extrapolation step-size and update step-size respectively. We note that in our convergence analysis,

we allow selecting *any* distribution  $\mathcal{D}$  that satisfies  $\mathbb{E}_{\mathcal{D}}[v_i] = 1 \forall i$ . This means that for a different selection of  $\mathcal{D}$ , (7) yields different interpretations of SPEG for solving the original problem (1).

One example of distribution  $\mathcal{D}$  is  $\tau$ -minibatch sampling, which is defined as follows.

**Definition 2.1** ( $\tau$ -Minibatch sampling). Let  $\tau \in [n]$ . We say that  $v \in \mathbb{R}^n$  is a  $\tau$ -minibatch sampling if for every subset  $S \in [n]$  with  $|S| = \tau$ , we have that  $\mathbb{P}[v = \frac{n}{\tau} \sum_{i \in S} e_i] := \frac{1}{\binom{n}{\tau}} = \frac{\tau!(n-\tau)!}{n!}$ .

By using a double counting argument, one can show that if  $v$  is a  $\tau$ -minibatch sampling, it is also a valid sampling vector ( $\mathbb{E}_{\mathcal{D}}[v_i] = 1$ ) [25]. We highlight that our analysis holds for every form of minibatching and for several choices of sampling vectors  $v$ . Later in Section 5, we provide more details related to non-uniform sampling. In addition, by Definition 2.1, it is clear that if  $\tau = n$ , then  $v_i = 1$  for all  $i \in [n]$ . Later in Section 4, we prove how our analysis captures the deterministic Past Extragradient Method as a special case.

In [44], an analysis of stochastic gradient descent-ascent ( $x_{k+1} = x_k - \omega_k F_{v_k}(x_k)$ ) under the arbitrary sampling paradigm was proposed for solving star-co-coercive VIPs. Later [20], extended this approach and provided general convergence guarantees for stochastic extragradient method (SEG) (a stochastic variant of the popular extragradient method [32, 30]) for solving quasi-strongly monotone and monotone VIPs. Despite its popularity, SEG requires two oracle calls per iteration which makes it prohibitively expensive in many large-scale applications and not easily applicable to the online learning problems [18]. This motivates us to explore in detail the convergence guarantees of single-call variants of extragradient methods (extragradient methods that require only a single oracle call per iteration).

**On Single-Call Extragradient Methods.** The seminal work of [56] is the first paper that proposes the deterministic Past Extragradient method. In the stochastic setting, [28] provides an analysis of several stochastic single-call extragradient methods for solving strongly monotone VIPs. In [28], it was also shown that in the unconstrained setting, the update rules of Past Extragradient and Optimistic Gradient are exactly equivalent (see also Proposition B.6 in appendix). Through this connection, and via our stochastic reformulation (6) our theoretical results hold also for the *Stochastic Optimistic Gradient Method* (SOG):  $x_{k+1} = x_k - \omega_k F_{v_k}(x_k) - \gamma_k (F_{v_k}(x_k) - F_{v_{k-1}}(x_{k-1}))$ . [8] provides the convergence guarantees of SOG for weak MVI. To the best of our knowledge, our work is the first that provides convergence guarantees for SOG under the arbitrary sampling paradigm (captures sampling beyond uniform sampling) and also without using the bounded variance assumption.

### 3 Expected Residual

In our theoretical results, we rely on Expected Residual (ER) condition. In this section, we define ER and explain how it is connected with similar conditions used in optimization literature. We further provide sufficient conditions for ER to hold and prove how it can be used to obtain a strictly weaker upper bound of  $\mathbb{E}\|g(x)\|^2$  than previously used growth conditions, expected co-coercivity, or bounded variance assumptions.

**Assumption 3.1.** We say the Expected Residual (ER) condition holds if there is a parameter  $\delta > 0$  such that for an unbiased estimator  $g(x)$  of the operator  $F$ , we have

$$\mathbb{E} [\|(g(x) - g(x^*)) - (F(x) - F(x^*))\|^2] \leq \frac{\delta}{2} \|x - x^*\|^2. \quad (\text{ER})$$

The ER condition bounds how far the stochastic estimator  $g(x) = F_v(x)$  (5) used in SPEG is from the true operator  $F(x)$ . ER depends on both the properties of the operator  $F(x)$  and of the selection of sampling (via  $g(x)$ ). Conditions similar to ER appeared before in optimization literature but they have never been used in operator theory and the analysis of SPEG. In particular, [24] used a similar condition for analyzing SGD in stochastic optimization problems but with the right-hand side of ER to be the function suboptimality  $f(x) - f(x^*)$  (such concept is not available in VIPs). In [68] and [21], similar conditions appear under the name “Hessian variance” assumption for distributed minimization problems. In the context of distributed VIPs, a similar but stronger condition to ER is used by [5].

**Bound on Operator Noise.** A common approach for proving the convergence of stochastic algorithms for solving the VIPs is assuming uniform boundedness of the stochastic operator or uniform boundedness of the variance. However, as we explain below, these assumptions either do not hold or

are true only for a restrictive set of problems. In our work, we do not assume such bounds. Instead, we use the following direct consequence of [ER](#).

**Lemma 3.2.** Let  $\sigma_*^2 := \mathbb{E}\|g(x^*)\|^2 < \infty$  (operator noise at the optimum is finite). If [ER](#) holds, then

$$\mathbb{E}\|g(x)\|^2 \leq \delta\|x - x^*\|^2 + \|F(x)\|^2 + 2\sigma_*^2. \quad (8)$$

**Sufficient Conditions for [ER](#).** Let us now provide sufficient conditions which guarantee that the [ER](#) condition holds and give a closed-form expression for the expected residual parameter  $\delta$  and  $\sigma_*^2 = \mathbb{E}\|g(x^*)\|^2$  for the case of  $\tau$ -minibatch sampling (Def. 2.1).

**Proposition 3.3.** Let  $F_i$  of problem (1) be  $L_i$ -Lipschitz operators, then [ER](#) holds. If, in addition, vector  $v \in \mathbb{R}^n$  is a  $\tau$ -minibatch sampling (Def. 2.1) then:  $\delta = \frac{2}{n\tau} \frac{n-\tau}{n-1} \sum_{i=1}^n L_i^2$ , and  $\sigma_*^2 = \frac{1}{n\tau} \frac{n-\tau}{n-1} \sum_{i=1}^n \|F_i(x^*)\|^2$ .

Similar results to Prop. 3.3 but under different sufficient conditions have been obtained for  $\tau$ -minibatch sampling under expected smoothness and a variant of expected residual for solving minimization problems in [25] and [24] respectively. In [44], a similar proposition was derived but for the much more restrictive class of co-coercive operators.

**Connection to Other Assumptions.** In the proofs of our convergence results, we use the bound (8), which, as we explained above, is a direct consequence of [ER](#). In this paragraph, we place this bound in a hierarchy of common assumptions used for the analysis of stochastic algorithms for solving VIPs. In the literature on stochastic algorithms for solving the VIPs and min-max optimization problems, previous works assume either bounded operator ( $\mathbb{E}\|g(x)\|^2 \leq c$ ) [1, 52], bounded variance ( $\mathbb{E}\|g(x) - F(x)\|^2 \leq c$ ) [35, 69, 30] (we provide an example in Appendix C where bounded variance assumption does not hold) or growth condition ( $\mathbb{E}\|g(x)\|^2 \leq c_1\|F(x)\|^2 + c_2$ ) [36]. In all of these conditions, the parameters  $c$ ,  $c_1$ , and  $c_2$  are usually constants that do not have a closed-form expression. The closer works to our results are [44, 6] which assumes existence of  $l_F > 0$  such that the expected co-coercivity condition ( $\mathbb{E}\|g(x) - g(x^*)\|^2 \leq l_F \langle F(x), x - x^* \rangle$ ) holds. Their convergence guarantees provide an efficient analysis for several variants of SGDA for solving co-coercive VIPs. In the proposition below, we prove how these conditions are related to the bound (8) obtained using [ER](#).

**Proposition 3.4.** Suppose  $F$  is a  $L$ -Lipschitz operator. Then we have the following hierarchy of assumptions:

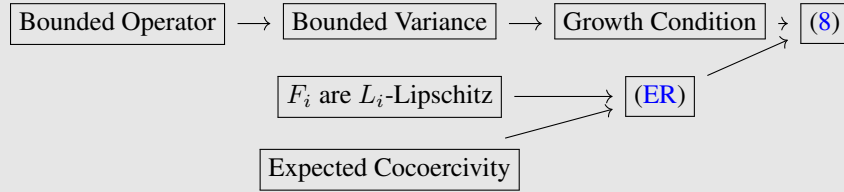

Let us also mention that [29] provided convergence guarantee of double-oracle stochastic extragradient (SEG) method under the variance control condition  $\mathbb{E}\|g(x) - F(x)\|^2 \leq (a\|x - x^*\| + b)^2$  where  $a, b \geq 0$ . In their work, they focus on solving VIPs satisfying the error-bound condition, and they did not provide closed-form expressions of parameters  $a$  and  $b$ . Although the analysis of [29] can be conducted with  $a > 0$ , the authors only provide rates for the case  $a = 0$ . The main difference between their results (for SEG) and our results (for SPEG) is that our bound (8) is not really an assumption, but it holds for free when  $F_i$  are  $L_i$ -Lipschitz. In addition, the values of parameters  $\delta$  and  $\sigma_*^2$  in (8) could have different values based on the sampling used in the update rule of SPEG.

## 4 Convergence Analysis

In this section, we present and discuss the main convergence results of this work. In the first part, we focus on the ones derived for  $\mu$ -quasi strongly monotone problems (3) (both for constant and decreasing step-sizes), and in the second part on the Weak Minty VIP (4).

### 4.1 Quasi-Strongly Monotone Problems

**Constant Step-size:** We start with the case of  $\mu$ -quasi strongly monotone problems and consider the convergence of SPEG with constant step-size.

**Theorem 4.1.** Let  $F$  be  $L$ -Lipschitz,  $\mu$ -quasi strongly monotone, and let [ER](#) hold. Choose step-sizes  $\gamma_k = \omega_k = \omega$  such that

$$0 < \omega \leq \min \left\{ \frac{\mu}{18\delta}, \frac{1}{4L} \right\} \quad (9)$$

for all  $k$ . Then the iterates produced by [SPEG](#), given by (7) satisfy

$$R_k^2 \leq \left(1 - \frac{\omega\mu}{2}\right)^k R_0^2 + \frac{24\omega\sigma_*^2}{\mu}, \quad (10)$$

where  $R_k^2 := \mathbb{E}[\|x_k - x^*\|^2 + \|x_k - \hat{x}_{k-1}\|^2]$ . Hence, given any  $\varepsilon > 0$ , and choosing  $\omega = \min \left\{ \frac{\mu}{18\delta}, \frac{1}{4L}, \frac{\varepsilon\mu}{48\sigma_*^2} \right\}$ , [SPEG](#) achieves  $\mathbb{E}\|x_K - x^*\|^2 \leq \varepsilon$  after  $K \geq \max \left\{ \frac{8L}{\mu}, \frac{36\delta}{\mu^2}, \frac{96\sigma_*^2}{\varepsilon\mu^2} \right\} \log \left( \frac{2R_0^2}{\varepsilon} \right)$  iterations.

To the best of our knowledge, the above theorem is the first result on the convergence of [SPEG](#) that does not rely on the bounded variance assumption. Theorem 4.1 recovers the same rate of convergence with the Independent-Samples SEG (I-SEG) under assumption (8) [20], although [20] simply assume (8), while we show that it follows from Assumption 3.1 holding whenever all summands  $F_i$  are Lipschitz. However, in the case when all  $F_i$  are  $\mu$ -quasi strongly monotone and  $L_i$ -Lipschitz (on average), one can use Same-Sample SEG (S-SEG). The existing results for S-SEG have better exponentially decaying term [49, 20] than Theorem 4.1, e.g., in the case when  $L_i = L$  for all  $i \in [n]$ , we have  $\delta = \mathcal{O}(L^2)$  meaning that the exponentially decaying term in (10) is  $\mathcal{O}(R_0^2 \exp(-\mu^2 k/L^2))$ , while S-SEG has much better exponentially decaying term  $\mathcal{O}(R_0^2 \exp(-\mu k/L))$ .

Such a discrepancy can be partially explained by the following fact: S-SEG can be seen as one step of deterministic Extragradient for stochastic operator  $F_{v_k}$  allowing to use one-iteration analysis of Extragradient without controlling the variance. In contrast, there is no version of [SPEG](#) that uses the same sample for extrapolation and update steps. This forces to use different samples for these steps and this is a key reason why [SPEG](#) cannot be seen as one iteration of deterministic Past-Extragradient for some operator. Due to this, we need to rely on some bound on the variance to handle the stochasticity in the updates; see also [20, Appendix F.1]. Therefore, in our analysis, we use Assumption 3.1, implying (8). Nevertheless, it is still an open question whether it is possible to improve the rate of [SPEG](#) in the case of  $\mu$ -quasi strongly monotone and Lipschitz operators  $F_i$ .

To highlight the generality of Theorem 4.1, we note that for the deterministic PEG,  $\delta = 0$  and  $\sigma_*^2 = 0$  (by selecting  $\tau = n$  in the definition 2.1 of minibatch sampling). In this case, Theorem 4.1 recovers the well-known result (up to  $1/2$  factor in the rate) for deterministic PEG proposed in [17] as shown in the following corollary.

**Corollary 4.2.** Let the assumptions of Theorem 4.1 hold and a deterministic version of [SPEG](#) is considered, i.e.,  $\delta = 0$ ,  $\sigma_*^2 = 0$ . Then, Theorem 4.1 implies that for all  $k \geq 0$  the iterates produced by [SPEG](#) with step-sizes  $\gamma_k = \omega_k = \omega$  such that  $0 < \omega \leq \frac{1}{4L}$  satisfy  $R_k^2 \leq \left(1 - \frac{\omega\mu}{2}\right)^k R_0^2$ , where  $R_k^2 := \|x_k - x^*\|^2 + \|x_k - \hat{x}_{k-1}\|^2$ .

**Decreasing Step-size:** In this section, we consider two different decreasing step-sizes policies for [SPEG](#) applied to solve quasi-strongly monotone problems.

**Theorem 4.3.** Let  $F$  be  $L$ -Lipschitz,  $\mu$ -quasi strongly monotone, and Assumption 3.1 hold. Let

$$\gamma_k = \omega_k := \begin{cases} \bar{\omega}, & \text{if } k \leq k^*, \\ \frac{2k+1}{(k+1)^2} \frac{2}{\mu}, & \text{if } k > k^*, \end{cases} \quad (11)$$

where  $\bar{\omega} := \min \{1/(4L), \mu/(18\delta)\}$  and  $k^* = \lceil 4/(\mu\bar{\omega}) \rceil$ . Then for all  $K \geq k^*$  the iterates produced by [SPEG](#) with step-sizes (11) satisfy

$$R_K^2 \leq \left(\frac{k^*}{K}\right)^2 \frac{R_0^2}{\exp(2)} + \frac{192\sigma_*^2}{\mu^2 K}, \quad (12)$$

where  $R_K^2 := \mathbb{E}[\|x_K - x^*\|^2 + \|x_K - \hat{x}_{K-1}\|^2]$ .



207 SPEG with step-size policy<sup>2</sup> (11) has two stages of convergence: during first  $k^*$  iterations it uses  
 208 constant step-size to reach some neighborhood of the solution and then the method switches to the  
 209 decreasing  $\mathcal{O}(1/k)$  step-size allowing to reduce the size of the neighborhood.

210 For the case of strongly monotone problems (a special case of our quasi-strongly monotone setting)  
 211 [28] also analyze SPEG with decreasing  $\mathcal{O}(1/k)$  step-size<sup>3</sup> under bounded variance assumption, i.e.,  
 212 when (8) holds with  $\delta = 0$  and some  $\sigma_*^2 \geq 0$ , which is equivalent to the uniformly bounded variance  
 213 assumption. In particular, Theorem 5 [28] states  $\mathbb{E} [\|x_K - x^*\|^2] \leq \frac{C\sigma_*^2}{\mu^2 K} + o(\frac{1}{K})$  where  $C$  is some  
 214 numerical constant. If the problem is strongly monotone, the result of [28] is closely related to what  
 215 is obtained in Theorem 4.3: the main difference in the upper-bound is that we provide an explicit  
 216 form of  $o(1/K)$  term. Moreover, in contrast to the result from [28], Theorem 4.3 holds even when  
 217  $\delta > 0$  in (8), which covers a larger class of problems.

218 Following [67, 20, 6], we also consider another decreasing step-size policy.

**Theorem 4.4.** Let  $F$  be  $L$ -Lipschitz,  $\mu$ -quasi strongly monotone, and Assumption 3.1 hold. Let  
 $\bar{\omega} := \min \{1/(4L), \mu/(18\delta)\}$ . If for  $K \geq 0$  step-sizes  $\{\gamma_k\}_{k \geq 0}, \{\omega_k\}_{k \geq 0}$  satisfy  $\gamma_k = \omega_k$  and

$$\omega_k := \begin{cases} \bar{\omega}, & \text{if } K \leq \frac{2}{\mu\bar{\omega}}, \\ \bar{\omega}, & \text{if } K > \frac{2}{\mu\bar{\omega}} \text{ and } k \leq k_0, \\ \frac{2}{\bar{\omega} + \frac{\mu}{2}(k - k_0)}, & \text{if } K > \frac{2}{\mu\bar{\omega}} \text{ and } k > k_0 \end{cases} \quad (13)$$

where  $k_0 = \lceil K/2 \rceil$ , then the iterates produced by SPEG with the step-sizes defined above satisfy

$$R_K^2 \leq \frac{64R_0^2}{\bar{\omega}\mu} \exp \left\{ -\min \left\{ \frac{\mu}{16L}, \frac{\mu^2}{72\delta} \right\} K \right\} + \frac{1728\sigma_*^2}{\mu^2 K}, \quad (14)$$

where  $R_K^2 := \mathbb{E} [\|x_K - x^*\|^2 + \|x_K - \hat{x}_{K-1}\|^2]$ .

219 In contrast to (12), the rate from (14) has much better (exponentially decaying)  $o(1/K)$  term. When  
 220  $\sigma_*^2$  is large and one needs to achieve very good accuracy of the solution, this difference is negligible,  
 221 since the dominating  $\mathcal{O}(1/K)$  term is the same for both bounds (up to numerical factors). However,  
 222 when  $\sigma_*^2$  is small enough, e.g., the model is close to over-parameterized, or it is sufficient to achieve  
 223 low accuracy of the solution, the dominating term in (14) is typically much smaller than the one  
 224 from (12). Finally, it is worth mentioning, that the improvement of  $o(1/K)$  is not achieved for free:  
 225 unlike the policy from (11), step-size rule (13) relies on the knowledge of the total number of steps  
 226  $K$ , which can be inconvenient for the practical use in some cases.

## 227 4.2 Weak Minty Variational Inequality Problems

228 In this subsection we will discuss convergence of Stochastic Past Extragradient method for Minty  
 229 Variational Inequality problem. To solve the Minty variational inequality problem we use different  
 230 step-sizes for SPEG iterates (7).

**Theorem 4.5.** Let  $F$  be  $L$ -Lipschitz and satisfy Weak Minty condition with parameter  $\rho < 1/(2L)$ .  
 Let Assumption 3.1 hold. Assume that  $\gamma_k = \gamma, \omega_k = \omega$  such that  $\max \{2\rho, \frac{1}{2L}\} < \gamma < \frac{1}{L}$  and  
 $0 < \omega < \min \{\gamma - 2\rho, \frac{1}{4L} - \frac{\gamma}{4}\}$ . Then, for all  $K \geq 2$  the iterates produced by mini-batched  
 SPEG with batch-size

$$\tau \geq \max \left\{ 1, \frac{32\delta}{(1-L\gamma)L^3\omega}, \frac{48\omega\gamma\delta(K-1)}{(1-L\gamma)^2}, \frac{2\omega\gamma\sigma_*^2(K-1)}{(1-L\gamma)\|x_0 - x^*\|^2} \right\} \quad (15)$$

satisfy  $\min_{0 \leq k \leq K-1} \mathbb{E} [\|F(\hat{x}_k)\|^2] \leq \frac{C\|x_0 - x^*\|^2}{K-1}$ , where  $C = \frac{48}{\omega\gamma(1-L(\gamma+4\omega))}$ .

231 The above result establishes  $\mathcal{O}(1/K)$  convergence with  $\mathcal{O}(K)$  batchsizes for SPEG applied to  
 232 problems satisfying Weak Minty condition. The closest result is obtained by [8], for the same method

<sup>2</sup>Similar step-size policy is used for SGD [25] and SGDA [44].

<sup>3</sup>We point out the proof by [28] can be generalized to the case of constant step-size, though the authors do not consider this step-size schedule explicitly.

under bounded variance assumption, i.e., when  $\delta = 0$ . In particular, the result of [8] also gives  $\mathcal{O}(1/K)$  rate and requires  $\mathcal{O}(K)$  batchsizes at each step. We extend this result to the case of non-zero  $\delta$  and we also improve the assumption on  $\rho$ : [8] assumes that  $\rho < 3/8L$ , while Theorem 4.5 holds for  $\rho < 1/2L$ . The bound on  $\rho$  cannot be improved even in the deterministic case [23]. Moreover, it is worth mentioning that the proof of Theorem 4.5 noticeably differs from the one obtained by [8].

In the case of a deterministic oracle, we recover the best-known result for Optimistic Gradient in the Weak Minty setup [8, 23].

**Corollary 4.6.** Let the assumptions of Theorem 4.5 hold and deterministic version of SPEG is considered, i.e.,  $\delta = 0$ ,  $\sigma_*^2 = 0$ . Then, Theorem 4.5 implies that for all  $k \geq 0$  the iterates produced by SPEG with step-sizes  $\max\{2\rho, \frac{1}{2L}\} < \gamma < \frac{1}{L}$  and  $0 < \omega < \min\{\gamma - 2\rho, \frac{1}{4L} - \frac{\gamma}{4}\}$  satisfy

$$\min_{0 \leq k \leq K-1} \|F(\hat{x}_k)\|^2 \leq \frac{C\|x_0 - x^*\|^2}{K-1}, \text{ where } C = \frac{48}{\omega\gamma(1-L(\gamma+4\omega))}.$$

## 5 Beyond Uniform Sampling

In this section, we illustrate the generality of our analysis by focusing on the non-uniform sampling. In particular, we focus on *single-element sampling* in which only the singleton sets  $\{i\}$  for  $i = \{1, \dots, n\}$  have a non-zero probability of being sampled; that is,  $\mathbb{P}[|S| = 1] = 1$ . We have  $\mathbb{P}[v = e_i/p_i] = p_i$ . [25] proved that if  $v$  is a single-element sampling, it is also a valid sampling vector ( $\mathbb{E}_{\mathcal{D}}[v_i] = 1$ ). With the following proposition, we provide closed-form expressions for the ER parameter  $\delta$  and  $\sigma_*^2 = \mathbb{E}\|g(x^*)\|^2$  for the case of (non-uniform) single-element sampling.

**Proposition 5.1.** Let  $F_i$  of problem (1) be  $L_i$ -Lipschitz operators. If, vector  $v \in \mathbb{R}^n$  is a single element sampling then  $\delta = \frac{2}{n^2} \sum_{i=1}^n \frac{L_i^2}{p_i}$  and  $\sigma_*^2 = \frac{1}{n^2} \sum_{i=1}^n \frac{1}{p_i} \|F_i(x^*)\|^2$ .

**Importance Sampling.** In importance sampling we aim to choose the probabilities  $p_i$  that optimize the iteration complexity. [25] and [20] analyze importance sampling for SGD and SEG respectively. In this work, we provide the first convergence guarantees of SPEG with importance sampling. In particular, we optimize the expected residual parameter  $\delta$  with respect to  $p_i$ , which in turn affects the iteration complexity. Note that, by using Cauchy-Schwarz inequality (20), we have  $\sum_{i=1}^n \frac{L_i^2}{p_i} \geq (\sum_{i=1}^n L_i)^2$ , and this lower bound can be achieved for  $p_i^\delta = L_i / \sum_{j=1}^n L_j$ . In case of importance sampling, we will use these probabilities  $p_i^\delta$  which optimizes  $\delta$  and define the corresponding  $\delta$  as  $\delta_{\text{IS}} := \frac{2}{n^2} (\sum_{i=1}^n L_i)^2$ . For uniform sampling (i.e.  $p_i = \frac{1}{n}$ ), the value of the parameter is  $\delta_{\text{US}} = \frac{2}{n} \sum_{i=1}^n L_i^2$ . Note that,  $\delta_{\text{IS}}$  equals  $\delta_{\text{US}}$  when all  $L_i$  are equal, however  $\delta_{\text{IS}}$  can be much smaller than  $\delta_{\text{US}}$  when  $L_i$  are very different from each other, e.g., when all  $L_i$  are relatively small (close to zero) and one  $L_i$  is large,  $\delta_{\text{IS}}$  is almost  $n$  times smaller than  $\delta_{\text{US}}$ . In this latter scenario (when  $\delta_{\text{IS}}$  is much smaller than  $\delta_{\text{US}}$ ), importance sampling could be useful and can significantly improve the performance of SPEG. For example, note that the exponentially decaying term in (14) decreases with  $\delta$ . Hence, this term will decrease much faster with importance sampling than with uniform sampling.

## 6 Numerical Experiments

The purpose of this experimental section is to corroborate our theoretical results, which form the main contributions of this paper. To verify our theoretical results, we run several experiments on two classes of problems, i.e., strongly monotone problems (a special case of the quasi-strongly monotone VIPs) and weak MVI problems.

### 6.1 Strongly Monotone Problems

Our experiments consider the quadratic strongly-convex strongly-concave min-max problem from [20]. That is, we implement SPEG on quadratic games of the form  $\min_{x \in \mathbb{R}^d} \max_{y \in \mathbb{R}^d} \frac{1}{n} \sum_{i=1}^n f_i(x, y)$  where

$$f_i(x, y) := \frac{1}{2} x^\top A_i x + x^\top B_i y - \frac{1}{2} y^\top C_i y + a_i^\top x - c_i^\top y. \quad (16)$$

Here  $A_i, B_i, C_i$  are generated such that the quadratic game is strongly monotone and smooth. In all our experiments, we take  $n = 100$  and  $d = 30$ . In Figures 1a, 1b, and 1c, we plot the relative error on the  $y$ -axis i.e.  $\frac{\|x_k - x^*\|^2}{\|x_0 - x^*\|^2}$ .



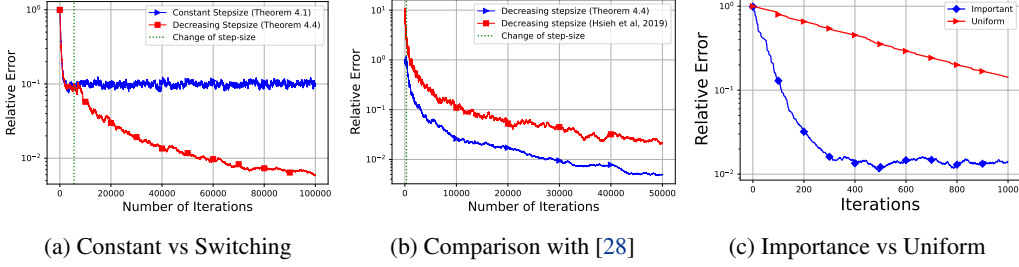

Figure 1: Experiments on strongly monotone quadratic games illustrating the theoretical results of the paper. (a) Comparison of the proposed constant step-size and the switching-step-size rule. (b) Comparison of the proposed switching step-size rule and the step-size proposed in [28], (c) Comparison of importance sampling and uniform sampling.

**Constant vs Switching Step-size Rule.** In Fig. 1a, we illustrate the step-size switching rule of Theorem 4.3. We place the dotted line to mark when we switch from constant step-size to decreasing step-size. In Fig. 1a, the trajectory of switching step-size rule (11) matches that of constant step-size (9) in the first phase (where SPEG runs with constant step-size following (11)). However, it becomes stagnant when the constant step-size SPEG reaches a neighbourhood of optimality. In contrast, the step-size of Theorem 4.3 helps the method to converge to better accuracy.

**Comparison with [28].** In this experiment, we compare SPEG step-sizes proposed in Theorems 4.1 and 4.3 with step-sizes from [28]. To implement SPEG with the step-sizes from [28], we choose  $\gamma$  and  $b$  such that  $\frac{1}{\mu} < \gamma \leq \frac{b}{4L}$  and set  $\omega_k = \gamma_k = \frac{\gamma}{k+b}$ . In Fig. 1b, we compare switching step-size rule with the step-size from [28]. In this plot, we manually switch the step-size from constant to decreasing after 305 steps. We observe that such a semi-empirical rule has comparable performance to the step-size selection of [28]. We also compare the constant step-size (9) with the decreasing step-size rule of [28] on a non-interpolated model, where our constant step-size rule outperforms [28] (Appendix G.1).

**Uniform vs Importance Sampling.** In this experiment, we highlight the advantage of using importance sampling over uniform sampling. The eigenvalues of  $A_1, C_1$  are uniformly generated from the interval  $[0.1, \Lambda]$ . We implement SPEG with both uniform and importance sampling for various choices of  $\Lambda$ . For importance sampling, we use the probabilities  $p_i = L_i / \sum_{j=1}^n L_j$ . For  $\Lambda = 20$  in Fig. 1c, SPEG with importance sampling has faster rate of convergence compared to uniform sampling. In Appendix G.1, we describe how the trajectories under uniform sampling get worse while the trajectory under importance sampling remains almost identical when we increase  $\Lambda$ .

## 6.2 Weak Minty Variational Inequality Problems

This experiment verifies the convergence guarantees of SPEG in Theorem 4.5. Following the min-max problem mentioned in [8], we consider the objective function

$$\min_{x \in \mathbb{R}} \max_{y \in \mathbb{R}} \frac{1}{n} \sum_{i=1}^n \xi_i x y + \frac{\zeta_i}{2} (x^2 - y^2). \quad (17)$$

In this experiment, we generate  $\xi_i, \zeta_i$  such that  $L = 8$  and  $\rho = 1/32$  for the above min-max problem [8]. We implement SPEG with extrapolation step  $\gamma_k = 0.08$  and update step  $\omega_k = 0.01$  which satisfies the conditions on step-size in Theorem 4.5. In Fig. 2, we use a batchsize of 6. This plot illustrates that for some weak MVI problems the requirement on the step-size from Theorem 4.5 can be too pessimistic and SPEG with relatively small batchsize achieves reasonable accuracy of the solution. The choice of batchsize ensures that bound (15) holds and  $\delta$  is small enough to guarantee convergence of SPEG. We also tried to compare SPEG with SEG+ from [54], however, the authors do not mention their choice of update step-size. We examined several decreasing update step-size for which SEG+ failed to converge. Further details on experiments can be found in Appendix G.1.

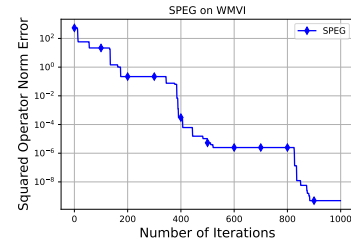

Figure 2: Trajectory of SPEG for solving weak MVI.

## References

- [1] J. Abernethy, K. A. Lai, and A. Wibisono. Last-iterate convergence rates for min-max optimization: Convergence of hamiltonian gradient descent and consensus optimization. In *Algorithmic Learning Theory*, pages 3–47. PMLR, 2021.
- [2] M. Arjovsky, S. Chintala, and L. Bottou. Wasserstein generative adversarial networks. In *ICML*, 2017.
- [3] S. Arora, N. Cohen, W. Hu, and Y. Luo. Implicit regularization in deep matrix factorization. *NeurIPS*, 2019.
- [4] H. H. Bauschke, W. M. Moursi, and X. Wang. Generalized monotone operators and their averaged resolvents. *Mathematical Programming*, 189(1):55–74, 2021.
- [5] A. Beznosikov and A. Gasnikov. Compression and data similarity: Combination of two techniques for communication-efficient solving of distributed variational inequalities. In *Optimization and Applications: 13th International Conference, OPTIMA 2022, Petrovac, Montenegro, September 26–30, 2022, Revised Selected Papers*, pages 151–162. Springer, 2023.
- [6] A. Beznosikov, E. Gorbunov, H. Berard, and N. Loizou. Stochastic gradient descent-ascent: Unified theory and new efficient methods. *arXiv preprint arXiv:2202.07262*, 2022.
- [7] A. Beznosikov, B. Polyak, E. Gorbunov, D. Kovalev, and A. Gasnikov. Smooth monotone stochastic variational inequalities and saddle point problems—survey. *arXiv preprint arXiv:2208.13592*, 2022.
- [8] A. Böhm. Solving nonconvex-nonconcave min-max problems exhibiting weak minty solutions. *arXiv preprint arXiv:2201.12247*, 2022.
- [9] N. Brown, A. Bakhtin, A. Lerer, and Q. Gong. Combining deep reinforcement learning and search for imperfect-information games. *NeurIPS*, 2020.
- [10] Y. Cai, A. Oikonomou, and W. Zheng. Tight last-iterate convergence of the extragradient method for constrained monotone variational inequalities. *arXiv preprint arXiv:2204.09228*, 2022.
- [11] P. L. Combettes and T. Pennanen. Proximal methods for cohypomonotone operators. *SIAM journal on control and optimization*, 43(2):731–742, 2004.
- [12] C. D. Dang and G. Lan. On the convergence properties of non-euclidean extragradient methods for variational inequalities with generalized monotone operators. *Computational Optimization and applications*, 60(2):277–310, 2015.
- [13] C. Daskalakis, S. Skoulakis, and M. Zampetakis. The complexity of constrained min-max optimization. In *Proceedings of the 53rd Annual ACM SIGACT Symposium on Theory of Computing*, pages 1466–1478, 2021.
- [14] J. Diakonikolas, C. Daskalakis, and M. Jordan. Efficient methods for structured nonconvex-nonconcave min-max optimization. In *AISTATS*, 2021.
- [15] R. D’Orazio, N. Loizou, I. Laradji, and I. Mitliagkas. Stochastic mirror descent: Convergence analysis and adaptive variants via the mirror stochastic polyak stepsize. *arXiv preprint arXiv:2110.15412*, 2021.
- [16] F. Facchinei and C. Kanzow. Generalized Nash equilibrium problems. *4OR*, 5(3):173–210, 2007.
- [17] G. Gidel, H. Berard, G. Vignoud, P. Vincent, and S. Lacoste-Julien. A variational inequality perspective on generative adversarial networks. *arXiv preprint arXiv:1802.10551*, 2018.
- [18] N. Golowich, S. Pattathil, and C. Daskalakis. Tight last-iterate convergence rates for no-regret learning in multi-player games. *NeurIPS*, 2020.

- [19] I. Goodfellow, J. Pouget-Abadie, M. Mirza, B. Xu, D. Warde-Farley, S. Ozair, A. Courville, and Y. Bengio. Generative adversarial nets. In *NeurIPS*, 2014.
- [20] E. Gorbunov, H. Berard, G. Gidel, and N. Loizou. Stochastic extragradient: General analysis and improved rates. In *AISTATS*, 2022.
- [21] E. Gorbunov, S. Horváth, P. Richtárik, and G. Gidel. Variance reduction is an antidote to byzantines: Better rates, weaker assumptions and communication compression as a cherry on the top. *arXiv preprint arXiv:2206.00529*, 2022.
- [22] E. Gorbunov, N. Loizou, and G. Gidel. Extragradient method:  $O(1/k)$  last-iterate convergence for monotone variational inequalities and connections with cocoercivity. In *AISTATS*, 2022.
- [23] E. Gorbunov, A. Taylor, S. Horváth, and G. Gidel. Convergence of proximal point and extragradient-based methods beyond monotonicity: the case of negative comonotonicity. *arXiv preprint arXiv:2210.13831*, 2022.
- [24] R. Gower, O. Sebbouh, and N. Loizou. Sgd for structured nonconvex functions: Learning rates, minibatching and interpolation. In *AISTATS*, 2021.
- [25] R. M. Gower, N. Loizou, X. Qian, A. Sailanbayev, E. Shulgin, and P. Richtárik. Sgd: General analysis and improved rates. In *ICML*, 2019.
- [26] F. Hanzely and P. Richtárik. Accelerated coordinate descent with arbitrary sampling and best rates for minibatches. In *AISTATS*, 2019.
- [27] S. Horváth and P. Richtárik. Nonconvex variance reduced optimization with arbitrary sampling. In *ICML*, 2019.
- [28] Y.-G. Hsieh, F. Iutzeler, J. Malick, and P. Mertikopoulos. On the convergence of single-call stochastic extra-gradient methods. *NeurIPS*, 2019.
- [29] Y.-G. Hsieh, F. Iutzeler, J. Malick, and P. Mertikopoulos. Explore aggressively, update conservatively: Stochastic extragradient methods with variable stepsize scaling. *NeurIPS*, 2020.
- [30] A. Juditsky, A. Nemirovski, and C. Tauvel. Solving variational inequalities with stochastic mirror-prox algorithm. *Stochastic Systems*, 1(1):17–58, 2011.
- [31] A. Khaled, O. Sebbouh, N. Loizou, R. M. Gower, and P. Richtárik. Unified analysis of stochastic gradient methods for composite convex and smooth optimization. *arXiv preprint arXiv:2006.11573*, 2020.
- [32] G. M. Korpelevich. The extragradient method for finding saddle points and other problems. *Matecon*, 12:747–756, 1976.
- [33] S. Lee and D. Kim. Fast extra gradient methods for smooth structured nonconvex-nonconcave minimax problems. *NeurIPS*, 2021.
- [34] C. J. Li, Y. Yu, N. Loizou, G. Gidel, Y. Ma, N. Le Roux, and M. Jordan. On the convergence of stochastic extragradient for bilinear games using restarted iteration averaging. In *AISTATS*, 2022.
- [35] T. Lin, C. Jin, and M. Jordan. On gradient descent ascent for nonconvex-concave minimax problems. In *ICML*, 2020.
- [36] T. Lin, Z. Zhou, P. Mertikopoulos, and M. Jordan. Finite-time last-iterate convergence for multi-agent learning in games. In *ICML*, 2020.
- [37] M. Liu, Y. Mroueh, J. Ross, W. Zhang, X. Cui, P. Das, and T. Yang. Towards better understanding of adaptive gradient algorithms in generative adversarial nets. *arXiv preprint arXiv:1912.11940*, 2019.
- [38] M. Liu, H. Rafique, Q. Lin, and T. Yang. First-order convergence theory for weakly-convex-weakly-concave min-max problems. *J. Mach. Learn. Res.*, 22:169–1, 2021.

- [39] N. Loizou and P. Richtárik. A new perspective on randomized gossip algorithms. In *2016 IEEE global conference on signal and information processing (GlobalSIP)*, pages 440–444. IEEE, 2016.
- [40] N. Loizou and P. Richtárik. Convergence analysis of inexact randomized iterative methods. *SIAM Journal on Scientific Computing*, 42(6):A3979–A4016, 2020.
- [41] N. Loizou and P. Richtárik. Momentum and stochastic momentum for stochastic gradient, newton, proximal point and subspace descent methods. *Computational Optimization and Applications*, 77(3):653–710, 2020.
- [42] N. Loizou and P. Richtárik. Revisiting randomized gossip algorithms: General framework, convergence rates and novel block and accelerated protocols. *IEEE Transactions on Information Theory*, 67(12):8300–8324, 2021.
- [43] N. Loizou, H. Berard, A. Jolicoeur-Martineau, P. Vincent, S. Lacoste-Julien, and I. Mitliagkas. Stochastic hamiltonian gradient methods for smooth games. In *ICML*, 2020.
- [44] N. Loizou, H. Berard, G. Gidel, I. Mitliagkas, and S. Lacoste-Julien. Stochastic gradient descent-ascent and consensus optimization for smooth games: Convergence analysis under expected co-coercivity. *NeurIPS*, 2021.
- [45] N. Loizou, S. Vaswani, I. Hadj Laradji, and S. Lacoste-Julien. Stochastic polyak step-size for sgd: An adaptive learning rate for fast convergence. In A. Banerjee and K. Fukumizu, editors, *AISTATS*, volume 130 of *Proceedings of Machine Learning Research*, pages 1306–1314. PMLR, 13–15 Apr 2021. URL <https://proceedings.mlr.press/v130/loizou21a.html>.
- [46] A. Madry, A. Makelov, L. Schmidt, D. Tsipras, and A. Vladu. Towards deep learning models resistant to adversarial attacks. In *ICLR*, 2018.
- [47] P. Mertikopoulos and Z. Zhou. Learning in games with continuous action sets and unknown payoff functions. *Mathematical Programming*, 173(1):465–507, 2019.
- [48] P. Mertikopoulos, B. Lecouat, H. Zenati, C.-S. Foo, V. Chandrasekhar, and G. Piliouras. Optimistic mirror descent in saddle-point problems: Going the extra (gradient) mile. *arXiv preprint arXiv:1807.02629*, 2018.
- [49] K. Mishchenko, D. Kovalev, E. Shulgin, P. Richtárik, and Y. Malitsky. Revisiting stochastic extragradient. In *AISTATS*, 2020.
- [50] A. Mokhtari, A. Ozdaglar, and S. Pattathil. A unified analysis of extra-gradient and optimistic gradient methods for saddle point problems: Proximal point approach. In *AISTATS*, 2020.
- [51] H. Namkoong and J. C. Duchi. Stochastic gradient methods for distributionally robust optimization with f-divergences. *NeurIPS*, 2016.
- [52] A. Nemirovski, A. Juditsky, G. Lan, and A. Shapiro. Robust stochastic approximation approach to stochastic programming. *SIAM Journal on optimization*, 19(4):1574–1609, 2009.
- [53] Y. Nesterov. Linear convergence of first order methods for non-strongly convex optimization. *Mathematical Programming*, 175:69–107, 2019.
- [54] T. Pethick, P. Patrinos, O. Fercoq, V. Cevher, et al. Escaping limit cycles: Global convergence for constrained nonconvex-nonconcave minimax problems. In *ICLR*, 2022.
- [55] T. Pethick, O. Fercoq, P. Latafat, P. Patrinos, and V. Cevher. Solving stochastic weak minty variational inequalities without increasing batch size. *arXiv preprint arXiv:2302.09029*, 2023.
- [56] L. D. Popov. A modification of the arrow-hurwicz method for search of saddle points. *Mathematical notes of the Academy of Sciences of the USSR*, 28(5):845–848, 1980.
- [57] X. Qian, Z. Qu, and P. Richtárik. Saga with arbitrary sampling. In *ICML*, 2019.
- [58] Z. Qu and P. Richtárik. Coordinate descent with arbitrary sampling i: Algorithms and complexity. *Optimization Methods and Software*, 31(5):829–857, 2016.

- 447 [59] P. Richtárik and M. Takáč. On optimal probabilities in stochastic coordinate descent methods.  
448 *arXiv preprint arXiv:1310.3438*, 2013.
- 449 [60] P. Richtárik and M. Takáč. Stochastic reformulations of linear systems: algorithms and  
450 convergence theory. *SIAM Journal on Matrix Analysis and Applications*, 41(2):487–524,  
451 2020.
- 452 [61] M. Rolinek and G. Martius. L4: Practical loss-based stepsize adaptation for deep learning.  
453 *NeurIPS*, 2018.
- 454 [62] E. K. Ryu, K. Yuan, and W. Yin. Ode analysis of stochastic gradient methods with optimism  
455 and anchoring for minimax problems. *arXiv preprint arXiv:1905.10899*, 2019.
- 456 [63] O. Sebbouh, N. Gazagnadou, S. Jelassi, F. Bach, and R. Gower. Towards closing the gap  
457 between the theory and practice of svrg. *NeurIPS*, 2019.
- 458 [64] S. Sokota, R. D’Orazio, J. Z. Kolter, N. Loizou, M. Lanctot, I. Mitliagkas, N. Brown, and  
459 C. Kroer. A unified approach to reinforcement learning, quantal response equilibria, and  
460 two-player zero-sum games. *arXiv preprint arXiv:2206.05825*, 2022.
- 461 [65] M. V. Solodov and B. F. Svaiter. A hybrid approximate extragradient–proximal point algorithm  
462 using the enlargement of a maximal monotone operator. *Set-Valued Analysis*, 7(4):323–345,  
463 1999.
- 464 [66] C. Song, Z. Zhou, Y. Zhou, Y. Jiang, and Y. Ma. Optimistic dual extrapolation for coherent  
465 non-monotone variational inequalities. In *NeurIPS*, 2020.
- 466 [67] S. U. Stich. Unified optimal analysis of the (stochastic) gradient method. *arXiv preprint*  
467 *arXiv:1907.04232*, 2019.
- 468 [68] R. Szlendak, A. Tyurin, and P. Richtárik. Permutation compressors for provably faster distributed  
469 nonconvex optimization. *arXiv preprint arXiv:2110.03300*, 2021.
- 470 [69] Q. Tran Dinh, D. Liu, and L. Nguyen. Hybrid variance-reduced sgd algorithms for minimax  
471 problems with nonconvex-linear function. *NeurIPS*, 2020.
- 472 [70] S. Vaswani, F. Bach, and M. Schmidt. Fast and faster convergence of sgd for over-parameterized  
473 models and an accelerated perceptron. In *AISTATS*, 2019.
- 474 [71] S. Vaswani, A. Mishkin, I. Laradji, M. Schmidt, G. Gidel, and S. Lacoste-Julien. Painless  
475 stochastic gradient: Interpolation, line-search, and convergence rates. *NeurIPS*, 2019.
- 476 [72] J. Wang, T. Zhang, S. Liu, P.-Y. Chen, J. Xu, M. Fardad, and B. Li. Adversarial attack generation  
477 empowered by min-max optimization. *NeurIPS*, 2021.
- 478 [73] Y. Yu, T. Lin, E. V. Mazumdar, and M. Jordan. Fast distributionally robust learning with  
479 variance-reduced min-max optimization. In *AISTATS*, 2022.

# Supplementary Material

We organize the Supplementary Material as follows: Section A discusses the existing literature related to our work. In Section B, we present some technical lemmas required for our analysis. Then in Section D, we provide the proofs of propositions related to Expected Residual. Next, Section E presents the proofs of the main theorems, while a proposition related to arbitrary sampling is proved in Section F. Finally, additional numerical experiments are presented in Section G.

## Contents

|          |                                                                                 |           |
|----------|---------------------------------------------------------------------------------|-----------|
| <b>1</b> | <b>Introduction</b>                                                             | <b>1</b>  |
| 1.1      | Main Contributions . . . . .                                                    | 2         |
| <b>2</b> | <b>Stochastic Reformulation of VIPs &amp; Single-Call Extragradient Methods</b> | <b>3</b>  |
| <b>3</b> | <b>Expected Residual</b>                                                        | <b>4</b>  |
| <b>4</b> | <b>Convergence Analysis</b>                                                     | <b>5</b>  |
| 4.1      | Quasi-Strongly Monotone Problems . . . . .                                      | 5         |
| 4.2      | Weak Minty Variational Inequality Problems . . . . .                            | 7         |
| <b>5</b> | <b>Beyond Uniform Sampling</b>                                                  | <b>8</b>  |
| <b>6</b> | <b>Numerical Experiments</b>                                                    | <b>8</b>  |
| 6.1      | Strongly Monotone Problems . . . . .                                            | 8         |
| 6.2      | Weak Minty Variational Inequality Problems . . . . .                            | 9         |
| <b>A</b> | <b>Further Related Work</b>                                                     | <b>16</b> |
| <b>B</b> | <b>Technical Preliminaries</b>                                                  | <b>18</b> |
| <b>C</b> | <b>Bounded Variance Counter Example:</b>                                        | <b>19</b> |
| <b>D</b> | <b>Proofs of Results on Expected Residual</b>                                   | <b>20</b> |
| D.1      | Proof of Lemma 3.2 . . . . .                                                    | 20        |
| D.2      | Proof of Proposition 3.3 . . . . .                                              | 21        |
| D.3      | Proof of Proposition 3.4 . . . . .                                              | 22        |
| <b>E</b> | <b>Main Convergence Analysis Results</b>                                        | <b>23</b> |
| E.1      | Proof of Theorem 4.1 . . . . .                                                  | 24        |
| E.2      | Proof of Theorem 4.3 . . . . .                                                  | 25        |
| E.3      | Proof of Theorem 4.4 . . . . .                                                  | 26        |
| E.4      | Proof of Theorem E.4 . . . . .                                                  | 26        |
| E.5      | Proof of Theorem 4.5 . . . . .                                                  | 31        |
| <b>F</b> | <b>Further Results on Arbitrary Sampling</b>                                    | <b>32</b> |
| F.1      | Proof of Proposition 5.1 . . . . .                                              | 32        |



|     |                                                                      |           |
|-----|----------------------------------------------------------------------|-----------|
| 513 | <b>G Numerical Experiments</b>                                       | <b>34</b> |
| 514 | G.1 More Details on the Numerical Experiments of Section 6 . . . . . | 34        |
| 515 | G.2 Additional Experiments . . . . .                                 | 35        |
| 516 | G.2.1 Strongly Monotone Quadratic Game: . . . . .                    | 36        |
| 517 | G.2.2 Weak Minty VIPs Continued . . . . .                            | 36        |

## A Further Related Work

The references necessary to motivate our work and connect it to the most relevant literature are included in the appropriate sections of the main body of the paper. In this section, we present a broader view of the literature, including more details on closely related work and more references to papers that are not directly related to our main results.

- Classes of Structured Non-monotone Operators.** With an increasing interest in improved computational speed, first-order methods are the primary choice for solving VIPs. However, computation of an approximate first-order locally optimal solution of a general non-monotone VIP is intractable [13, 33]. It motivates us to exploit the additional structures prevalent in large classes of non-monotone VIPs. Recently [20, 28] provide convergence guarantees of stochastic methods for solving quasi-strongly monotone VIPs, while [29] for problems satisfying error-bound conditions. [14] defined the notion of a weak MVI (4) covering classes of non-monotone VIPs.
- Assumptions on Operator Noise.** The standard analysis of stochastic methods for solving VIPs relies on bounded variance assumption. [8, 14, 28, 17] use bounded variance assumption (i.e.  $\mathbb{E}\|F_i(x) - F(x)\|^2 \leq \sigma^2$  for all  $x$ ) while [52, 1] assume bounded operators for their analysis. However, there are examples of simple quadratic games that do not satisfy these conditions. It has motivated researchers to look for alternative/relaxed assumptions on distributions. [44] provides convergence of Stochastic Gradient Descent/Ascent Method under Expected Cocoercivity. [29, 49] considered alternative assumptions for analyzing Stochastic Extragradient Methods that do not imply boundedness of the variance. However, there is no analysis of single-call extragradient methods without bounded variance assumption.
- Weak Minty Variational Inequalities.** Numerous contemporary studies look to identify first-order methods for efficiently solving min-max optimization problems. It varies from simple convex-concave to nontrivial nonconvex nonconcave objectives. Though there has been a significant development in the convex-concave setting, [13] demonstrates that even finding local solutions are intractable for general nonconvex nonconcave objectives. Therefore, researchers seek to identify the structure of objective functions for which it is possible to resolve the intractability issues. [14] proposes the notion of non-monotonicity, which generalizes the existence of a Minty solution (i.e.,  $\rho = 0$  in (4)). This problem is known as weak Minty variational inequality in the literature. [14, 54] provides convergence guarantees of the Extragradient Method for weak Minty variational inequality. They establish a convergence rate of  $\mathcal{O}(1/k)$  for the squared operator norm. [33] shows that it is possible to have an accelerated extragradient method even for non-monotone problems. Furthermore, [8] provides a convergence guarantee for the SOG with a complexity bound of  $\mathcal{O}(\varepsilon^{-2})$ . However, all papers exploring stochastic extragradient methods for solving weak Minty variational inequality consider bounded variance assumption [8, 14]. Moreover, all algorithms solving Weak Minty variational inequality require increasing batchsize. Recently, [55] introduced BCSEG+ which can solve weak minty variational inequality without increasing batchsize. BCSEG+ involves three oracle calls per iteration and addition of a bias-corrected term in the extrapolation step.
- Arbitrary Sampling Paradigm.** As we mentioned in the main paper, the stochastic reformulation (6) of the original problem (1) allows us to analyze single-call extragradient methods under the arbitrary sampling paradigm. That is, provide a unified analysis for SPEG that captures multiple sampling strategies, including  $\tau$ -minibatch and importance samplings. An arbitrary sampling analysis of a stochastic optimization method was first proposed in the context of the randomized coordinate descent method for solving strongly convex functions in [59]. Since then, several other stochastic methods were studied in this regime, including accelerated coordinate descent algorithms [58, 26], randomized iterative methods for solving consistent linear systems [60, 41, 40], randomized gossip algorithms [39, 42], stochastic gradient descent (SGD) [25, 24], and variance reduced methods [57, 27, 31]. The first analysis of stochastic algorithms under the arbitrary sampling paradigm for solving variational inequality problems was proposed in [43, 44]. In [43, 44], the authors focus on algorithms like the stochastic Hamiltonian method, the stochastic gradient descent ascent, and the stochastic consensus optimization. These ideas were later extended to the case of Stochastic Extragradient by [20]. To the best of our knowledge, our work is the first that provides an analysis of single-call extragradient methods under the arbitrary sampling paradigm.

- 573 • **Overparameterized Models and Interpolation.** For a function  $f(x) := \frac{1}{n} \sum_{i=1}^n f_i(x)$  we say  
574 that interpolation condition holds if there exists  $x^*$  such that  $\min_x f_i(x) = f_i(x^*)$  for all  $i \in [n]$   
575 (or equivalently  $\nabla f_i(x^*) = 0$  for smooth convex functions) [24]. The interpolation condition  
576 is satisfied when the underlying models are sufficiently overparameterized [70]. Some known  
577 examples include deep matrix factorization and classification using neural networks [3, 61, 70].  
578 The interpolated model structure enables SGD and other optimization algorithms to have faster  
579 convergence [24, 45, 15]. Inspired by this, one can extend the notion of the interpolation condition  
580 to operators. In this scenario, we say that the VIP (1) is interpolated if there exists solution  $x^*$  of (1)  
581 such that  $F_i(x^*) = 0$  for all  $i \in [n]$ . This concept has been explored for analyzing the stochastic  
582 extragradient method in [71, 34]. We highlight that our proposed theorems show fast convergence  
583 of SPEG in this interpolated regime (when  $\sigma_*^2 = 0$ ). To the best of our knowledge, our work is  
584 the first that proves such convergence for SPEG. In Fig. 3b, we experimentally verify the fast  
585 convergence for solving a strongly monotone interpolated problem.
- 586 • **Deterministic Extragradient Methods.** The Extragradient method (EG) [32] and its single-call  
587 variant, Optimistic Gradient (OG) [56], were proposed to overcome the convergence issues of  
588 gradient descent-ascent method for solving monotone problems. Since their introduction, these  
589 methods have been revisited and explored in various ways. [50] analyzed EG and OG as an  
590 approximation of the Proximal Point method to solve bilinear and strongly convex-strongly concave  
591 min-max problems. [65] and [62] provide the best-iterate convergence guarantees of EG and  
592 OG with a rate of  $\mathcal{O}(1/\kappa)$  for solving monotone problems. However, providing a last-iterate  
593 convergence rate of EG and OG for monotone VIPs has been a long-lasting open problem that  
594 was only recently resolved. The works of [18, 22, 10] prove a last-iterate  $\mathcal{O}(1/\kappa)$  convergence rate  
595 for these methods. Finally, in the deterministic setting, some recent works provide convergence  
596 analysis of EG and OG for solving weak MVI (4) [14, 54, 8, 23].

## 597 B Technical Preliminaries

598 Throughout our work, we assume

**Assumption B.1.** Operator  $F$  in (1) is  $L$  Lipschitz, i.e.,  $\forall x, y \in \mathbb{R}^d$  operator  $F$  satisfies

$$\|F(x) - F(y)\| \leq L\|x - y\|. \quad (18)$$

Operators  $F_i : \mathbb{R}^d \rightarrow \mathbb{R}^d$  of problem (1) are  $L_i$ - Lipschitz, i.e.,  $\forall x, y \in \mathbb{R}^d$  operator  $F_i$  satisfies

$$\|F_i(x) - F_i(y)\| \leq L_i\|x - y\|. \quad (19)$$

599 In our proofs, we often use the following simple inequalities.

**Lemma B.2.** For all  $a, b, a_1, a_2, \dots, a_n \in \mathbb{R}^d, n \geq 1, \alpha > 0$ , we have the following inequalities:

$$\langle a, b \rangle \leq \|a\|\|b\|, \quad (20)$$

$$\langle a, b \rangle \leq \frac{1}{2\alpha}\|a\|^2 + \frac{\alpha}{2}\|b\|^2, \quad (21)$$

$$\|a + b\|^2 \leq 2\|a\|^2 + 2\|b\|^2, \quad (22)$$

$$\|a\|^2 \geq \frac{1}{2}\|a + b\|^2 - \|b\|^2, \quad (23)$$

$$\left\| \sum_{i=1}^n a_i \right\|^2 \leq n \sum_{i=1}^n \|a_i\|^2. \quad (24)$$

600 Inequality (22) is well known as Young's Inequality. Now, we present a simple property of unbiased  
601 estimators.

**Lemma B.3.** For an unbiased estimator  $g$  of operator  $F$  i.e.  $\mathbb{E}[g(x)] = F(x)$  we have

$$\mathbb{E}\|g(x) - F(x)\|^2 = \mathbb{E}\|g(x)\|^2 - \|F(x)\|^2. \quad (25)$$

602 Next, we present the following lemma from [67], which plays a vital role in proving the convergence  
603 guarantee of Theorem 4.4.

**Lemma B.4.** (Simplified Verison of Lemma 3 from [67]) Let the non-negative sequence  $\{r_k\}_{k \geq 0}$  satisfy the relation  $r_{k+1} \leq (1 - a\gamma_k)r_k + c\gamma_k^2$  for all  $k \geq 0$ , parameters  $a, c \geq 0$  and any non-negative sequence  $\{\gamma_k\}_{k \geq 0}$  such that  $\gamma_k \leq \frac{1}{h}$  for some  $h \geq a, h > 0$ . Then for any  $K \geq 0$  one can choose  $\{\gamma_k\}_{k \geq 0}$  as follows:

$$\begin{aligned} & \text{if } K \leq \frac{h}{a}, & \gamma_k &= \frac{1}{h}, \\ & \text{if } K > \frac{h}{a} \text{ and } k < k_0, & \gamma_k &= \frac{1}{h}, \\ & \text{if } K > \frac{h}{a} \text{ and } k \geq k_0, & \gamma_k &= \frac{2}{a(\kappa + k - k_0)}, \end{aligned}$$

where  $\kappa = \frac{2h}{a}$  and  $k_0 = \lceil \frac{K}{2} \rceil$ . For this choice of  $\gamma_k$  the following inequality holds:

$$r_K \leq \frac{32hr_0}{a} \exp\left(-\frac{aK}{2h}\right) + \frac{36c}{a^2K}.$$

604 We use the next lemma to bound the trace of matrix products.

605 **Lemma B.5.** For positive semidefinite matrices  $A, B \in \mathbb{R}^{d \times d}$  we have

$$\text{tr}(AB) \leq \lambda_{\max}(B)\text{tr}(A), \quad (26)$$

where  $\lambda_{\max}(B)$  denotes the maximum eigenvalue of  $B$ .

Next lemma proves equivalence of SPEG and SOG:

**Proposition B.6 (Equivalence of SPEG and SOG).** Consider the iterates of SPEG  $\{x_k, \hat{x}_k\}_{k=1}^{\infty}$  with constant step-sizes  $\omega_k = \omega, \gamma_k = \gamma$  in (7). Then  $\hat{x}_k$  follows the iteration rule of SOG i.e.

$$\hat{x}_{k+1} = \hat{x}_k - \omega_k F_{v_k}(\hat{x}_k) - \gamma_k [F_{v_k}(\hat{x}_k) - F_{v_{k-1}}(x_{k-1})] \quad (27)$$

*Proof.* From the update rule of SPEG (7) we get

$$\begin{aligned} \hat{x}_{k+1} &= x_{k+1} - \gamma F_{v_k}(\hat{x}_k) \\ &= x_k - \omega F_{v_k}(\hat{x}_k) - \gamma F_{v_k}(\hat{x}_k) \\ &= x_k - (\omega + \gamma) F_{v_k}(\hat{x}_k) \\ &= \hat{x}_k + \gamma F_{v_{k-1}}(\hat{x}_{k-1}) - (\omega + \gamma) F_{v_k}(\hat{x}_k) \\ &= \hat{x}_k - \omega F_{v_k}(\hat{x}_k) - \gamma (F_{v_k}(\hat{x}_k) - F_{v_{k-1}}(\hat{x}_{k-1})). \end{aligned}$$

This shows that SPEG iterations are equivalent to SOG, with  $\hat{x}_k$  being the  $k$ -th iterate of SOG.  $\square$

## C Bounded Variance Counter Example:

Here we provide a simple counterexample for bounded variance assumption. Consider the linear regression problem

$$\min_{x \in \mathbb{R}} f(x) := \frac{1}{2}(a_1x - b_1)^2 + \frac{1}{2}(a_2x - b_2)^2$$

where  $x \in \mathbb{R}$ . Here  $f_1(x) = (a_1x - b_1)^2$  and  $f_2(x) = (a_2x - b_2)^2$ . Now consider the estimator  $g(x)$  of  $\nabla f(x)$  under uniform sampling i.e.  $g(x)$  takes the value  $\nabla f_1(x)$  with probability  $\frac{1}{2}$  and  $\nabla f_2(x)$  with probability  $\frac{1}{2}$ . Then we have

$$\begin{aligned} \mathbb{E}\|g(x) - \nabla f(x)\|^2 &= \frac{1}{2}\|\nabla f_1(x) - \nabla f(x)\|^2 + \frac{1}{2}\|\nabla f_2(x) - \nabla f(x)\|^2 \\ &= \frac{1}{2} \cdot \frac{1}{4}\|\nabla f_1(x) - \nabla f_2(x)\|^2 + \frac{1}{2} \cdot \frac{1}{4}\|\nabla f_2(x) - \nabla f_1(x)\|^2 \\ &= \frac{1}{4}\|\nabla f_1(x) - \nabla f_2(x)\|^2 \\ &= \frac{1}{4}(2(a_1x - b_1)a_1 - 2(a_2x - b_2)a_2)^2 \\ &= ((a_1^2 - a_2^2)x - (a_1b_1 - a_2b_2))^2 \end{aligned}$$

Therefore  $\mathbb{E}\|g(x) - \nabla f(x)\|^2$  is a quadratic function of  $x$  where the coefficient of  $x$  is positive. Hence, as  $x \rightarrow \infty$ , we have  $\mathbb{E}\|g(x) - \nabla f(x)\|^2 \rightarrow \infty$ , and the variance can not be bounded by a constant.

## 619 D Proofs of Results on Expected Residual

### 620 D.1 Proof of Lemma 3.2

621 *Proof.* Using Young's Inequality (22), we get

$$\begin{aligned}\mathbb{E}\|g(x) - F(x)\|^2 &\stackrel{(22)}{\leq} 2\mathbb{E}\|g(x) - F(x) - g(x^*)\|^2 + 2\mathbb{E}\|g(x^*)\|^2 \\ &\stackrel{(\text{ER})}{\leq} \delta\|x - x^*\|^2 + 2\mathbb{E}\|g(x^*)\|^2.\end{aligned}$$

622 Then breaking down the RHS, we obtain

$$\mathbb{E}\|g(x)\|^2 - \|F(x)\|^2 \stackrel{(25)}{\leq} \delta\|x - x^*\|^2 + 2\mathbb{E}\|g(x^*)\|^2.$$

623 Now we rearrange the terms and set  $\sigma_*^2 = \mathbb{E}\|g(x^*)\|^2$  to complete the proof of this Lemma.  $\square$

**Proposition D.1.** If  $F_i$  are  $L_i$ -lipschitz then Expected Residual condition (ER) holds. In that case

$$\delta = \frac{2}{n} \sum_{i=1}^n L_i^2 \mathbb{E}(v_i^2).$$

In addition, if  $F$  is  $\mu$ -quasi strongly monotone (3) then we have

$$\delta = \frac{2}{n} \sum_{i=1}^n L_i^2 \mathbb{E}(v_i^2) - 2\mu^2.$$

624 *Proof.* Note that

$$\begin{aligned}\mathbb{E}\|(F_v(x) - F_v(x^*)) - (F(x) - F(x^*))\|^2 &= \mathbb{E}\|F_v(x) - F_v(x^*)\|^2 + \|F(x) - F(x^*)\|^2 \\ &\quad - 2\mathbb{E}\langle F_v(x) - F_v(x^*), F(x) - F(x^*) \rangle \\ &= \mathbb{E}\|F_v(x) - F_v(x^*)\|^2 - \|F(x) - F(x^*)\|^2 \\ &= \mathbb{E}\|F_v(x) - F_v(x^*)\|^2 - \|F(x)\|^2 \\ &= \mathbb{E}\left\|\frac{1}{n} \sum_{i=1}^n v_i(F_i(x) - F_i(x^*))\right\|^2 - \|F(x)\|^2 \\ &= \frac{1}{n^2} \mathbb{E}\left\|\sum_{i=1}^n v_i(F_i(x) - F_i(x^*))\right\|^2 - \|F(x)\|^2 \\ &\stackrel{(24)}{\leq} \frac{1}{n} \sum_{i=1}^n \mathbb{E}(v_i^2) \|F_i(x) - F_i(x^*)\|^2 - \|F(x)\|^2 \\ &\stackrel{(19)}{\leq} \frac{\|x - x^*\|^2}{n} \sum_{i=1}^n \mathbb{E}(v_i^2) L_i^2 - \|F(x)\|^2. \quad (28)\end{aligned}$$

The first part of the lemma follows by ignoring the positive term  $\|F(x)\|^2$ . For the second part we assume  $F$  is  $\mu$ -quasi strongly monotone. Then we have

$$\mu\|x - x^*\|^2 \stackrel{(3)}{\leq} \langle F(x), x - x^* \rangle \stackrel{(20)}{\leq} \|F(x)\| \|x - x^*\|.$$

625 Cancelling  $\|x - x^*\|$  from both sides we get

$$\mu\|x - x^*\| \leq \|F(x)\|. \quad (29)$$

626 Therefore we have the following bound for  $\mu$ -quasi strongly monotone operator  $F$ :

$$\mathbb{E}\|(F_v(x) - F_v(x^*)) - (F(x) - F(x^*))\|^2 \stackrel{(28),(29)}{\leq} \left(\frac{1}{n} \sum_{i=1}^n \mathbb{E}(v_i^2) L_i^2 - \mu^2\right) \|x - x^*\|^2.$$

627 This proves the second part of the lemma. This lemma ensures that the Lipschitz property is sufficient  
628 to guarantee Expected Residual (ER) condition.  $\square$



## 629 D.2 Proof of Proposition 3.3

630 *Proof.* Proposition D.1 implies that Lipschitzness of all operators  $F_i$  is enough to ensure that ER holds.  
 631 For  $\tau$ -minibatch sampling, denote the matrix  $\mathbf{R} = (F_1(x) - F_1(x^*), \dots, F_n(x) - F_n(x^*)) \in \mathbb{R}^{d \times n}$ .  
 632 Then we obtain the following bound:

$$\begin{aligned}
 \mathbb{E}\|F_v(x) - F_v(x^*) - (F(x) - F(x^*))\|^2 &= \mathbb{E}\left\|\frac{1}{n} \sum_{i=1}^n (v_i(F_i(x) - F_i(x^*)) - (F_i(x) - F_i(x^*)))\right\|^2 \\
 &= \frac{1}{n^2} \mathbb{E}\left\|\sum_{i=1}^n (v_i - 1)(F_i(x) - F_i(x^*))\right\|^2 \\
 &= \frac{1}{n^2} \mathbb{E}\|\mathbf{R}(v - \mathbf{1})\|^2 \\
 &= \frac{1}{n^2} \mathbb{E}(v - \mathbf{1})^\top \mathbf{R}^\top \mathbf{R} (v - \mathbf{1}) \\
 &= \frac{1}{n^2} \mathbb{E}\left(\text{tr}\left(\mathbf{R}^\top \mathbf{R} (v - \mathbf{1})(v - \mathbf{1})^\top\right)\right) \\
 &= \frac{1}{n^2} \text{tr}\left(\mathbf{R}^\top \mathbf{R} \mathbb{E}\left((v - \mathbf{1})(v - \mathbf{1})^\top\right)\right) \\
 &= \frac{1}{n^2} \text{tr}\left(\mathbf{R}^\top \mathbf{R} \text{Var}[v]\right) \\
 &\stackrel{(26)}{\leq} \frac{\lambda_{\max}(\mathbf{Var}[v])}{n^2} \text{tr}(\mathbf{R}^\top \mathbf{R}) \\
 &= \frac{\lambda_{\max}(\mathbf{Var}[v])}{n^2} \sum_{i=1}^n \|F_i(x) - F_i(x^*)\|^2 \\
 &\stackrel{(19)}{\leq} \frac{\lambda_{\max}(\mathbf{Var}[v])\|x - x^*\|^2}{n^2} \sum_{i=1}^n L_i^2.
 \end{aligned}$$

633 From the proof details of Lemma F.3 in [63] we have  $\lambda_{\max}(\mathbf{Var}[v]) = \frac{n(n-\tau)}{\tau(n-1)}$  for  $\tau$ -minibatch  
 634 sampling. Thus we obtain

$$\mathbb{E}\|F_v(x) - F_v(x^*) - (F(x) - F(x^*))\|^2 \leq \frac{2(n-\tau)}{n\tau(n-1)} \sum_{i=1}^n L_i^2 \|x - x^*\|^2.$$

635 Now we focus on the derivation of  $\sigma_*^2 = \mathbb{E}\|F_v(x^*)\|^2$  for  $\tau$ -minibatch sampling. We expand  
 636  $\mathbb{E}\|F_v(x^*)\|^2$  as follows:

$$\begin{aligned}
 \mathbb{E}\|F_v(x^*)\|^2 &= \frac{1}{n^2} \mathbb{E}\left\|\sum_{i=1}^n v_i F_i(x^*)\right\|^2 \\
 &= \frac{1}{n^2} \mathbb{E}\left\|\sum_{i \in S} \frac{1}{p_i} F_i(x^*)\right\|^2 \\
 &= \frac{1}{n^2} \mathbb{E}\left\|\sum_{i=1}^n \mathbf{1}_{i \in S} \frac{1}{p_i} F_i(x^*)\right\|^2 \\
 &= \frac{1}{n^2} \mathbb{E}\left\langle \sum_{i=1}^n \mathbf{1}_{i \in S} \frac{1}{p_i} F_i(x^*), \sum_{j=1}^n \mathbf{1}_{j \in S} \frac{1}{p_j} F_j(x^*) \right\rangle \\
 &= \frac{1}{n^2} \sum_{i,j=1}^n \frac{P_{ij}}{p_i p_j} \langle F_i(x^*), F_j(x^*) \rangle, \tag{30}
 \end{aligned}$$

637 where  $P_{ij} = P(i, j \in S)$  and  $p_i = P(i \in S)$ . For  $\tau$ -minibatch sampling, we obtain  $P_{ij} = \frac{\tau(\tau-1)}{n(n-1)}$   
 638 and  $p_i = \frac{\tau}{n}$ . Plugging in these values of  $P_{ij}$  and  $p_i$  in (30) we get the closed-form expression of  $\sigma_*^2$ .  
 639 This completes the proof of Proposition 3.3.  $\square$

### 640 D.3 Proof of Proposition 3.4

641 Here we enlist the assumptions made on operators. Suppose  $g$  is an estimator of operator  $F$ .

- 1. **Bounded Operator:**  $\mathbb{E}\|g(x)\|^2 \leq \sigma^2$
- 2. **Bounded Variance:**  $\mathbb{E}\|g(x) - F(x)\|^2 \leq \sigma^2$
- 3. **Growth Condition:**  $\mathbb{E}\|g(x)\|^2 \leq \alpha\|F(x)\|^2 + \beta$
- 4. **Expected Co-coercivity:**  $\mathbb{E}\|g(x) - g(x^*)\|^2 \leq l_F \langle F(x), x - x^* \rangle$
- 5. **Expected Residual:**  $\mathbb{E}\|(g(x) - g(x^*)) - (F(x) - F(x^*))\|^2 \leq \frac{\delta}{2}\|x - x^*\|^2$
- 6. **Bound from Lemma 3.2:**  $\mathbb{E}\|g(x)\|^2 \leq \delta\|x - x^*\|^2 + \|F(x)\|^2 + 2\sigma_*^2$
- 7.  $F_i$  are Lipschitz:  $\|F_i(x) - F_i(y)\| \leq L_i\|x - y\| \quad \forall i = 1, \dots, n$

642 *Proof.* Here we will prove Proposition 3.4

- 643 • 1  $\implies$  2. Note that  $\mathbb{E}\|g(x)\|^2 \leq \sigma^2 \leq \|F(x)\|^2 + \sigma^2 \implies \mathbb{E}\|g(x) - F(x)\| \leq \sigma^2$ .
- 644 • 2  $\implies$  3. Here  $\mathbb{E}\|g(x) - F(x)\|^2 \leq \sigma^2 \implies \mathbb{E}\|g(x)\|^2 \leq \|F(x)\|^2 + \sigma^2$  as  $g$  is an  
645 unbiased for estimator of  $F$ . Then take  $\alpha = 1$  and  $\beta = \sigma^2$ .
- 646 • 3  $\implies$  6. Note that  $\mathbb{E}\|g(x)\|^2 \leq \alpha\|F(x)\|^2 + \beta \leq \alpha L^2\|x - x^*\|^2 + \beta$ . The last inequality  
647 follows from lipschitz property of  $F$  and  $F(x^*) = 0$ . Then choose  $\delta = \alpha L^2$  and  $\sigma_*^2 = \beta/2$   
648 to get the result.
- 649 • 4  $\implies$  5. Note that expected cocoercivity and  $L$ -Lipschitzness of  $F$  imply  $\mathbb{E}\|(g(x) -$   
650  $g(x^*)) - (F(x) - F(x^*))\|^2 = \mathbb{E}\|g(x) - g(x^*)\|^2 - \|F(x) - F(x^*)\|^2 \leq \mathbb{E}\|g(x) -$   
651  $g(x^*)\|^2 \leq l_F \langle F(x), x - x^* \rangle \stackrel{(B.2)}{\leq} \frac{l_F}{2L}\|F(x)\|^2 + \frac{l_F L}{2}\|x - x^*\|^2 \leq l_F L\|x - x^*\|^2$ .
- 652 • 7  $\implies$  5. This follows from Proposition D.1.
- 653 • 5  $\implies$  6. This follows from Lemma 3.2

654 □

## 655 E Main Convergence Analysis Results

656 First, we present some results followed by iterates of **SPEG**. These will play a key role in proving  
 657 the Theorems later in this section. Recall that iterates of **SPEG** are

$$\begin{aligned}\hat{x}_k &= x_k - \gamma_k F_{v_{k-1}}(\hat{x}_{k-1}), \\ x_{k+1} &= x_k - \omega_k F_{v_k}(\hat{x}_k).\end{aligned}$$

**Lemma E.1.** For **SPEG** iterates with step-size  $\omega_k = \gamma_k = \omega$ , we have

$$\|x_{k+1} - x^*\|^2 = \|x_{k+1} - \hat{x}_k\|^2 + \|x_k - x^*\|^2 - \|\hat{x}_k - x_k\|^2 - 2\omega \langle F_{v_k}(\hat{x}_k), \hat{x}_k - x^* \rangle. \quad (31)$$

658 *Proof.* We have

$$\begin{aligned}\|x_{k+1} - x^*\|^2 &= \|x_{k+1} - \hat{x}_k + \hat{x}_k - x_k + x_k - x^*\|^2 \\ &= \|x_{k+1} - \hat{x}_k\|^2 + \|\hat{x}_k - x_k\|^2 + \|x_k - x^*\|^2 + 2 \langle \hat{x}_k - x_k, x_k - x^* \rangle \\ &\quad + 2 \langle x_{k+1} - \hat{x}_k, \hat{x}_k - x_k \rangle + 2 \langle x_{k+1} - \hat{x}_k, x_k - x^* \rangle \\ &= \|x_{k+1} - \hat{x}_k\|^2 + \|\hat{x}_k - x_k\|^2 + \|x_k - x^*\|^2 + 2 \langle x_{k+1} - \hat{x}_k, \hat{x}_k - x^* \rangle \\ &\quad + 2 \langle \hat{x}_k - x_k, x_k - x^* \rangle \\ &= \|x_{k+1} - \hat{x}_k\|^2 + \|\hat{x}_k - x_k\|^2 + \|x_k - x^*\|^2 + 2 \langle x_{k+1} - \hat{x}_k, \hat{x}_k - x^* \rangle \\ &\quad + 2 \langle \hat{x}_k - x_k, x_k - \hat{x}_k + \hat{x}_k - x^* \rangle \\ &= \|x_{k+1} - \hat{x}_k\|^2 + \|\hat{x}_k - x_k\|^2 + \|x_k - x^*\|^2 + 2 \langle x_{k+1} - \hat{x}_k, \hat{x}_k - x^* \rangle \\ &\quad + 2 \langle \hat{x}_k - x_k, \hat{x}_k - x^* \rangle - 2 \|\hat{x}_k - x_k\|^2 \\ &= \|x_{k+1} - \hat{x}_k\|^2 - \|\hat{x}_k - x_k\|^2 + \|x_k - x^*\|^2 + 2 \langle x_{k+1} - \hat{x}_k, \hat{x}_k - x^* \rangle \\ &\quad + 2 \langle \hat{x}_k - x_k, \hat{x}_k - x^* \rangle \\ &= \|x_{k+1} - \hat{x}_k\|^2 - \|\hat{x}_k - x_k\|^2 + \|x_k - x^*\|^2 + 2 \langle x_{k+1} - x_k, \hat{x}_k - x^* \rangle \\ &= \|x_{k+1} - \hat{x}_k\|^2 - \|\hat{x}_k - x_k\|^2 + \|x_k - x^*\|^2 - 2\omega \langle F_{v_k}(\hat{x}_k), \hat{x}_k - x^* \rangle.\end{aligned}$$

659 □

**Lemma E.2.** Let  $F$  be  $L$ -Lipschitz, and let **ER** hold. Then **SPEG** iterates satisfy

$$\mathbb{E}_{\mathcal{D}} \|F_{v_k}(\hat{x}_k) - F_{v_{k-1}}(\hat{x}_{k-1})\|^2 \leq \delta \|\hat{x}_k - x^*\|^2 + 2\delta \|\hat{x}_{k-1} - x^*\|^2 + 2L^2 \|\hat{x}_k - \hat{x}_{k-1}\|^2 + 6\sigma_*^2. \quad (32)$$

*Proof.*

$$\begin{aligned}\mathbb{E}_{\mathcal{D}} \|F_{v_k}(\hat{x}_k) - F_{v_{k-1}}(\hat{x}_{k-1})\|^2 &= \mathbb{E}_{\mathcal{D}} \|F_{v_k}(\hat{x}_k) - F(\hat{x}_k)\|^2 + \mathbb{E}_{\mathcal{D}} \|F(\hat{x}_k) - F_{v_{k-1}}(\hat{x}_{k-1})\|^2 \\ &\quad + 2\mathbb{E}_{\mathcal{D}} \langle F_{v_k}(\hat{x}_k) - F(\hat{x}_k), F(\hat{x}_k) - F_{v_{k-1}}(\hat{x}_{k-1}) \rangle \\ &= \mathbb{E}_{v_k} \|F_{v_k}(\hat{x}_k) - F(\hat{x}_k)\|^2 + \mathbb{E}_{\mathcal{D}} \|F(\hat{x}_k) - F_{v_{k-1}}(\hat{x}_{k-1})\|^2 \\ &\stackrel{(22)}{\leq} \mathbb{E}_{\mathcal{D}} \|F_{v_k}(\hat{x}_k) - F(\hat{x}_k)\|^2 + 2\mathbb{E}_{\mathcal{D}} \|F(\hat{x}_k) - F(\hat{x}_{k-1})\|^2 \\ &\quad + 2\mathbb{E}_{\mathcal{D}} \|F(\hat{x}_{k-1}) - F_{v_{k-1}}(\hat{x}_{k-1})\|^2 \\ &= \mathbb{E}_{\mathcal{D}} \|F_{v_k}(\hat{x}_k)\|^2 - \|F(\hat{x}_k)\|^2 + 2\|F(\hat{x}_k) - F(\hat{x}_{k-1})\|^2 \\ &\quad + 2\mathbb{E}_{\mathcal{D}} \|F_{v_{k-1}}(\hat{x}_{k-1})\|^2 - 2\|F(\hat{x}_{k-1})\|^2 \\ &\stackrel{(8)}{\leq} \delta \|\hat{x}_k - x^*\|^2 + 2\delta \|\hat{x}_{k-1} - x^*\|^2 + 6\sigma_*^2 + 2\|F(\hat{x}_k) - F(\hat{x}_{k-1})\|^2 \\ &\stackrel{(18)}{\leq} \delta \|\hat{x}_k - x^*\|^2 + 2\delta \|\hat{x}_{k-1} - x^*\|^2 + 6\sigma_*^2 + 2L^2 \|\hat{x}_k - \hat{x}_{k-1}\|^2.\end{aligned}$$

660 □

**Lemma E.3.** For  $\omega \in \left[0, \frac{1}{4L}\right]$  the following two conditions hold:

$$2\omega(\mu - \omega\delta) + 8\omega^2 L^2 - 1 \leq 0, \quad (33)$$

$$\text{and } 8\omega^2(\delta + L^2) \leq 1 - \omega\mu + 9\omega^2\delta. \quad (34)$$

*Proof.* Note that for  $\omega \in \left[0, \frac{1}{4L}\right]$ , we have

$$2\omega(\mu - \omega\delta) + 8\omega^2 L^2 - 1 \stackrel{\omega^2\delta \geq 0}{\leq} 2\omega\mu + 8\omega^2 L^2 - 1 \stackrel{\omega \leq \frac{1}{4L}}{\leq} \frac{\mu}{2L} + \frac{1}{2} - 1 \stackrel{\mu \leq L}{\leq} 0.$$

This proves the first condition. The second condition is equivalent to  $\omega(\mu - \omega\delta) + 8\omega^2 L^2 - 1 \leq 0$ , which is again true using similar arguments.  $\square$

### E.1 Proof of Theorem 4.1

*Proof.* For  $\omega \in \left[0, \frac{\mu}{18\delta}\right]$  we have  $\omega(\mu - 9\omega\delta) \geq 0$  and  $1 - \omega(\mu - 9\omega\delta) \leq 1 - \frac{\omega\mu}{2}$ . Then we derive

$$\begin{aligned} \mathbb{E}_{\mathcal{D}}[\|x_{k+1} - x^*\|^2 + \|x_{k+1} - \hat{x}_k\|^2] &\stackrel{(31)}{=} \|x_k - x^*\|^2 + 2\mathbb{E}_{\mathcal{D}}\|x_{k+1} - \hat{x}_k\|^2 - \|\hat{x}_k - x_k\|^2 \\ &\quad - 2\omega\mathbb{E}_{\mathcal{D}}\langle F_{v_k}(\hat{x}_k), \hat{x}_k - x^* \rangle \\ &= \|x_k - x^*\|^2 + 2\mathbb{E}_{\mathcal{D}}\|x_{k+1} - \hat{x}_k\|^2 - \|\hat{x}_k - x_k\|^2 \\ &\quad - 2\omega\langle F(\hat{x}_k), \hat{x}_k - x^* \rangle \\ &\stackrel{(3)}{\leq} \|x_k - x^*\|^2 + 2\mathbb{E}_{\mathcal{D}}\|x_{k+1} - \hat{x}_k\|^2 - \|\hat{x}_k - x_k\|^2 \\ &\quad - 2\omega\mu\|\hat{x}_k - x^*\|^2 \\ &= \|x_k - x^*\|^2 + 2\omega^2\mathbb{E}_{\mathcal{D}}\|F_{v_k}(\hat{x}_k) - F_{v_{k-1}}(\hat{x}_{k-1})\|^2 - \|\hat{x}_k - x_k\|^2 \\ &\quad - 2\omega\mu\|\hat{x}_k - x^*\|^2 \\ &\stackrel{(32)}{\leq} \|x_k - x^*\|^2 + 2\omega^2\left(\delta\|\hat{x}_k - x^*\|^2 + 2\delta\|\hat{x}_{k-1} - x^*\|^2\right. \\ &\quad \left.+ 2L^2\|\hat{x}_k - \hat{x}_{k-1}\|^2 + 6\sigma_*^2\right) - \|\hat{x}_k - x_k\|^2 - 2\omega\mu\|\hat{x}_k - x^*\|^2 \\ &= \|x_k - x^*\|^2 - 2\omega(\mu - \omega\delta)\|\hat{x}_k - x^*\|^2 + 4\omega^2\delta\|\hat{x}_{k-1} - x^*\|^2 \\ &\quad + 4\omega^2 L^2\|\hat{x}_k - \hat{x}_{k-1}\|^2 - \|\hat{x}_k - x_k\|^2 + 12\omega^2\sigma_*^2 \\ &\stackrel{(22)}{\leq} \|x_k - x^*\|^2 - \omega(\mu - \omega\delta)\|x_k - x^*\|^2 + 2\omega(\mu - \omega\delta)\|x_k - \hat{x}_k\|^2 \\ &\quad + 4\omega^2\delta\|\hat{x}_{k-1} - x^*\|^2 + 4\omega^2 L^2\|\hat{x}_k - \hat{x}_{k-1}\|^2 - \|\hat{x}_k - x_k\|^2 \\ &\quad + 12\omega^2\sigma_*^2 \\ &\stackrel{(22)}{\leq} \|x_k - x^*\|^2 - \omega(\mu - \omega\delta)\|x_k - x^*\|^2 + 2\omega(\mu - \omega\delta)\|x_k - \hat{x}_k\|^2 \\ &\quad + 8\omega^2\delta\|\hat{x}_{k-1} - x_k\|^2 + 8\omega^2\delta\|x_k - x^*\|^2 + 8\omega^2 L^2\|\hat{x}_k - x_k\|^2 \\ &\quad + 8\omega^2 L^2\|x_k - \hat{x}_{k-1}\|^2 - \|\hat{x}_k - x_k\|^2 + 12\omega^2\sigma_*^2 \\ &= (1 - \omega\mu + 9\omega^2\delta)\|x_k - x^*\|^2 + (8\omega^2\delta + 8\omega^2 L^2)\|x_k - \hat{x}_{k-1}\|^2 \\ &\quad + (2\omega(\mu - \omega\delta) + 8\omega^2 L^2 - 1)\|x_k - \hat{x}_k\|^2 + 12\omega^2\sigma_*^2 \\ &\stackrel{(33),(34)}{\leq} (1 - \omega\mu + 9\omega^2\delta)\left(\|x_k - x^*\|^2 + \|x_k - \hat{x}_{k-1}\|^2\right) + 12\omega^2\sigma_*^2. \end{aligned}$$

Then we take total expectation with respect to the algorithm to obtain the following recurrence:

$$R_{k+1}^2 \leq (1 - \omega\mu + 9\omega^2\delta)R_k^2 + 12\omega^2\sigma_*^2. \quad (35)$$

666 Using the inequality  $1 - \omega(\mu - 9\omega\delta) \leq 1 - \frac{\omega\mu}{2}$ , we have

$$\mathbb{E} \left[ \|x_{k+1} - x^*\|^2 + \|x_{k+1} - \hat{x}_k\|^2 \right] \leq \left( 1 - \frac{\omega\mu}{2} \right) \mathbb{E} \left[ \|x_k - x^*\|^2 + \|x_k - \hat{x}_{k-1}\|^2 \right] + 12\omega^2\sigma_*^2. \quad (36)$$

667 The theorem follows by unrolling the above recurrence. In order to compute the iteration complexity  
 668 of **SPEG**, we consider any arbitrary  $\varepsilon > 0$ . Then we choose the step-size  $\omega$  such that  $\frac{24\omega\sigma_*^2}{\mu} \leq \frac{\varepsilon}{2}$   
 669 i.e.  $\omega \leq \frac{\varepsilon\mu}{48\sigma_*^2}$ . Next we will choose the number of iterations  $k$  such that  $(1 - \frac{\omega\mu}{2})^k R_0^2 \leq \frac{\varepsilon}{2}$ . It is  
 670 equivalent to choosing  $k$  such that

$$\log \left( \frac{2R_0^2}{\varepsilon} \right) \leq k \log \left( \frac{1}{1 - \frac{\omega\mu}{2}} \right).$$

671 Now using the fact  $\log \left( \frac{1}{\rho} \right) \geq 1 - \rho$  for  $0 < \rho \leq 1$ , we get  $\log \left( \frac{2R_0^2}{\varepsilon} \right) \leq \frac{k\omega\mu}{2}$ , or equivalently  
 672  $k \geq \frac{2}{\omega\mu} \log \left( \frac{2R_0^2}{\varepsilon} \right)$ . Therefore, with step-size  $\omega = \min \left\{ \frac{\mu}{18\delta}, \frac{1}{4L}, \frac{\varepsilon\mu}{48\sigma_*^2} \right\}$  we get the following lower  
 673 bound on the number of iterations

$$k \geq \max \left\{ \frac{8L}{\mu}, \frac{36\delta}{\mu^2}, \frac{96\sigma_*^2}{\varepsilon\mu^2} \right\} \log \left( \frac{2R_0^2}{\varepsilon} \right).$$

674 □

## 675 E.2 Proof of Theorem 4.3

*Proof.* For  $\omega \leq \min \left\{ \frac{1}{4L}, \frac{\mu}{18\delta} \right\}$ , from Theorem 4.1 we obtain

$$R_{k+1}^2 \leq \left( 1 - \frac{\omega\mu}{2} \right)^{k+1} R_0^2 + \frac{24\omega\sigma_*^2}{\mu}.$$

Let the step-size  $\omega_k = \frac{2k+1}{(k+1)^2} \frac{2}{\mu}$  and  $k^*$  be an integer that satisfies  $\omega_{k^*} \leq \bar{\omega}$ . In particular this holds  
 when  $k^* \geq \left\lceil \frac{4}{\mu\bar{\omega}} - 1 \right\rceil$ . Note that  $\omega_k$  is decreasing in  $k$  and consequently  $\omega_k \leq \bar{\omega}$  for all  $k \geq k^*$ .  
 Therefore, from (36) we derive

$$R_{k+1}^2 \leq \left( 1 - \omega_k \frac{\mu}{2} \right) R_k^2 + 12\omega_k^2\sigma_*^2$$

676 for all  $k \geq k^*$ . Then we replace  $\omega_k$  with  $\frac{2k+1}{(k+1)^2} \frac{2}{\mu}$  to obtain

$$R_{k+1}^2 \leq \left( 1 - \frac{2k+1}{(k+1)^2} \right) R_k^2 + 48\sigma_*^2 \frac{(2k+1)^2}{\mu^2(k+1)^4} \quad (37)$$

$$= \frac{k^2}{(k+1)^2} R_k^2 + 48\sigma_*^2 \frac{(2k+1)^2}{\mu^2(k+1)^4}. \quad (38)$$

677 Multiplying both sides by  $(k+1)^2$  we get

$$(k+1)^2 R_{k+1}^2 \leq k^2 R_k^2 + \frac{48\sigma_*^2}{\mu^2} \left( \frac{2k+1}{k+1} \right)^2 \quad (39)$$

$$\leq k^2 R_k^2 + \frac{192\sigma_*^2}{\mu^2}, \quad (40)$$

678 where in the last line follows from  $\frac{2k+1}{k+1} < 2$ . Rearranging and summing the last expression for  
 679  $t = k^*, \dots, k$  we obtain

$$\sum_{t=k^*}^k (t+1)^2 R_{t+1}^2 - t^2 R_t^2 \leq \frac{192\sigma_*^2}{\mu^2} (k - k^*).$$

Using telescopic sum and dividing both sides by  $(k+1)^2$  we obtain

$$R_{k+1}^2 \leq \left( \frac{k^*}{k+1} \right)^2 R_{k^*}^2 + \frac{192\sigma_*^2(k-k^*)}{\mu^2(k+1)^2}. \quad (41)$$

Suppose for  $k \leq k^*$ , we have  $\omega_k = \bar{\omega} = \min \left\{ \frac{1}{4L}, \frac{\mu}{18\delta} \right\}$  i.e. constant step-size. Then from (10), we

obtain  $R_{k^*}^2 \leq \left( 1 - \frac{\mu\bar{\omega}}{2} \right)^{k^*} R_0^2 + \frac{24\bar{\omega}\sigma_*^2}{\mu}$ . This bound on  $R_{k^*}^2$ , combined with (41) yields

$$R_{k+1}^2 \leq \left( \frac{k^*}{k+1} \right)^2 \left( 1 - \frac{\mu\bar{\omega}}{2} \right)^{k^*} R_0^2 + \left( \frac{k^*}{k+1} \right)^2 \frac{24\bar{\omega}\sigma_*^2}{\mu} + \frac{192\sigma_*^2(k-k^*)}{\mu^2(k+1)^2}.$$

Now we want to choose  $k^*$  which minimizes the expression  $\left( \frac{k^*}{k+1} \right)^2 \frac{24\bar{\omega}\sigma_*^2}{\mu} + \frac{192\sigma_*^2(k-k^*)}{\mu^2(k+1)^2}$ . Note that,

it is minimized at  $\frac{4}{\mu\bar{\omega}}$ , hence we choose  $k^* = \left\lceil \frac{4}{\mu\bar{\omega}} \right\rceil$ . Therefore, using this value of  $k^*$ , we obtain

$$\begin{aligned} R_{k+1}^2 &\leq \left( \frac{k^*}{k+1} \right)^2 \left( 1 - \frac{2}{k^*} \right)^{k^*} R_0^2 + \frac{24\sigma_*^2}{\mu^2(k+1)^2} (8k - 4k^*) \\ &\leq \left( \frac{k^*}{k+1} \right)^2 \left( 1 - \frac{2}{k^*} \right)^{k^*} R_0^2 + \frac{192k\sigma_*^2}{\mu^2(k+1)^2} \\ &\leq \left( \frac{k^*}{k+1} \right)^2 \frac{R_0^2}{e^2} + \frac{192\sigma_*^2}{\mu^2(k+1)}. \end{aligned}$$

The last line follows from  $\left( 1 - \frac{1}{x} \right)^x \leq e^{-1}$  for all  $x \geq 1$ . This completes the proof.  $\square$

### E.3 Proof of Theorem 4.4

*Proof.* For  $0 < \omega_k \leq \left\{ \frac{1}{4L}, \frac{\mu}{18\delta} \right\}$  we obtain the following bound from Theorem 4.1:

$$R_k^2 \leq \left( 1 - \frac{\mu\omega_k}{2} \right) R_{k-1}^2 + 12\omega_k^2\sigma_*^2.$$

Then using Lemma B.4 with  $a = \frac{\mu}{2}$ ,  $h = \frac{1}{\omega}$  and  $c = 12\sigma_*^2$  we complete the proof of this Theorem.  $\square$

### E.4 Proof of Theorem E.4

**Theorem E.4.** Let  $F$  be  $L$ -Lipschitz and satisfy Weak Minty condition with parameter  $\rho < 1/(2L)$ . Assume that inequality (8) holds (e.g., it holds whenever Assumption 3.1 holds, see Lemma 3.2). Assume that  $\gamma_k = \gamma$ ,  $\omega_k = \omega$  and

$$\max \left\{ 2\rho, \frac{1}{2L} \right\} < \gamma < \frac{1}{L}, \quad 0 < \omega < \min \left\{ \gamma - 2\rho, \frac{1}{4L} - \frac{\gamma}{4} \right\}, \quad \delta \leq \frac{(1-L\gamma)L^3\omega}{32}.$$

Then, for all  $K \geq 2$  the iterates produced by SPEG satisfy

$$\begin{aligned} \min_{0 \leq k \leq K-1} \mathbb{E} [\|F(\hat{x}_k)\|^2] &\leq \frac{(1 + 8\omega\gamma(\delta + L^2) - L\gamma) \left( 1 + \frac{48\omega\gamma\delta}{(1-L\gamma)^2} \right)^{K-1} \|x_0 - x^*\|^2}{\omega\gamma(1 - L(\gamma + 4\omega))(K-1)} \\ &\quad + \frac{8 \left( 8 + \frac{(1-L\gamma)^2}{K-1} \left( 1 + \frac{48\omega\gamma\delta}{(1-L\gamma)^2} \right)^{K-1} \right) \sigma_*^2}{(1-L\gamma)^2(1-L(\gamma + 4\omega))}. \end{aligned} \quad (42)$$

*Proof.* The proof closely follows the proof of Lemma C.3 and Theorem C.4 from [23]. The update rule of SPEG implies for  $k \geq 1$

$$\begin{aligned} \|x_{k+1} - x^*\|^2 &= \|x_k - x^*\|^2 - 2\omega \langle x_k - x^*, F_{v_k}(\hat{x}_k) \rangle + \omega^2 \|F_{v_k}(\hat{x}_k)\|^2 \\ &= \|x_k - x^*\|^2 - 2\omega \langle \hat{x}_k - x^*, F_{v_k}(\hat{x}_k) \rangle - 2\omega\gamma \langle F_{v_{k-1}}(\hat{x}_{k-1}), F_{v_k}(\hat{x}_k) \rangle + \omega^2 \|F_{v_k}(\hat{x}_k)\|^2 \\ &= \|x_k - x^*\|^2 - 2\omega \langle \hat{x}_k - x^*, F_{v_k}(\hat{x}_k) \rangle - \omega\gamma \|F_{v_{k-1}}(\hat{x}_{k-1})\|^2 - \omega(\gamma - \omega) \|F_{v_k}(\hat{x}_k)\|^2 \\ &\quad + \omega\gamma \|F_{v_k}(\hat{x}_k) - F_{v_{k-1}}(\hat{x}_{k-1})\|^2, \end{aligned}$$



691 where in the last step we apply  $2\langle a, b \rangle = \|a\|^2 + \|b\|^2 - \|a - b\|^2$ , which holds for all  $a, b \in \mathbb{R}^d$ .  
692 Taking the full expectation and using  $\mathbb{E}[\mathbb{E}_{v_k}[\cdot]] = \mathbb{E}[\cdot]$  and Weak Minty condition, we derive

$$\begin{aligned}
\mathbb{E}[\|x_{k+1} - x^*\|^2] &\leq \mathbb{E}[\|x_k - x^*\|^2] - 2\omega\mathbb{E}[\langle \hat{x}_k - x^*, F(\hat{x}_k) \rangle] - \omega\gamma\mathbb{E}[\|F_{v_{k-1}}(\hat{x}_{k-1})\|^2] \\
&\quad - \omega(\gamma - \omega)\mathbb{E}[\|F_{v_k}(\hat{x}_k)\|^2] + \omega\gamma\mathbb{E}[\|F_{v_k}(\hat{x}_k) - F_{v_{k-1}}(\hat{x}_{k-1})\|^2] \\
&\stackrel{(4)}{\leq} \mathbb{E}[\|x_k - x^*\|^2] + 2\omega\rho\mathbb{E}[\|F(\hat{x}_k)\|^2] - \omega\gamma\mathbb{E}[\|F_{v_{k-1}}(\hat{x}_{k-1})\|^2] \\
&\quad - \omega(\gamma - \omega)\mathbb{E}[\|F_{v_k}(\hat{x}_k)\|^2] + \omega\gamma\mathbb{E}[\|F_{v_k}(\hat{x}_k) - F_{v_{k-1}}(\hat{x}_{k-1})\|^2] \\
&\leq \mathbb{E}[\|x_k - x^*\|^2] - \omega\gamma\mathbb{E}[\|F_{v_{k-1}}(\hat{x}_{k-1})\|^2] - \omega(\gamma - 2\rho - \omega)\mathbb{E}[\|F_{v_k}(\hat{x}_k)\|^2] \\
&\quad + \omega\gamma\mathbb{E}[\|F_{v_k}(\hat{x}_k) - F_{v_{k-1}}(\hat{x}_{k-1})\|^2] \\
&\leq \mathbb{E}[\|x_k - x^*\|^2] - \omega\gamma\mathbb{E}[\|F_{v_{k-1}}(\hat{x}_{k-1})\|^2] + \omega\gamma\mathbb{E}[\|F_{v_k}(\hat{x}_k) - F_{v_{k-1}}(\hat{x}_{k-1})\|^2] \quad (4\beta)
\end{aligned}$$

693 where we apply Jensen's inequality  $\|F(\hat{x}_k)\|^2 = \|\mathbb{E}_{v_k}[F_{v_k}(\hat{x}_k)]\|^2 \leq \mathbb{E}_{v_k}[\|F_{v_k}(\hat{x}_k)\|^2]$  and  $\gamma >$   
694  $2\rho + \omega$ . For  $k = 0$  we have  $x_1 = x_0 - \omega F_{v_0}(\hat{x}_0) = x_0 - \omega F_{v_0}(x_0)$  and

$$\begin{aligned}
\mathbb{E}[\|x_1 - x^*\|^2] &= \|x_0 - x^*\|^2 - 2\omega\mathbb{E}[\langle x_0 - x^*, F_{v_0}(x_0) \rangle] + \omega^2\mathbb{E}[\|F_{v_0}(x_0)\|^2] \\
&= \|x_0 - x^*\|^2 - 2\omega\langle x_0 - x^*, F(x_0) \rangle + \omega^2\mathbb{E}[\|F_{v_0}(x_0)\|^2].
\end{aligned}$$

695 Applying Weak Minty condition, we get

$$\begin{aligned}
\mathbb{E}[\|x_1 - x^*\|^2] &= \|x_0 - x^*\|^2 + 2\omega\rho\|F(x_0)\|^2 + \omega^2\mathbb{E}[\|F_{v_0}(x_0)\|^2] \\
&\leq \|x_0 - x^*\|^2 + \omega(\omega + 2\rho)\mathbb{E}[\|F_{v_0}(x_0)\|^2]. \quad (44)
\end{aligned}$$

696 The next step of our proof is in estimating the last term from (43). Using Young's inequality  
697  $\|a + b\|^2 \leq (1 + \alpha)\|a\|^2 + (1 + \alpha^{-1})\|b\|^2$ , which holds for any  $a, b \in \mathbb{R}^d$ ,  $\alpha > 0$ , we get for all  
698  $k \geq 2$

$$\begin{aligned}
\mathbb{E}[\|F_{v_k}(\hat{x}_k) - F_{v_{k-1}}(\hat{x}_{k-1})\|^2] &\leq (1 + \alpha)\mathbb{E}[\|F(\hat{x}_k) - F(\hat{x}_{k-1})\|^2] \\
&\quad + (1 + \alpha^{-1})\mathbb{E}[\|F_{v_k}(\hat{x}_k) - F(\hat{x}_k) - (F_{v_{k-1}}(\hat{x}_{k-1}) - F(\hat{x}_{k-1}))\|^2] \\
&\leq (1 + \alpha)L^2\mathbb{E}[\|\hat{x}_k - \hat{x}_{k-1}\|^2] \\
&\quad + 2(1 + \alpha^{-1})\mathbb{E}[\|F_{v_k}(\hat{x}_k) - F(\hat{x}_k)\|^2 + \|F_{v_{k-1}}(\hat{x}_{k-1}) - F(\hat{x}_{k-1})\|^2] \\
&\stackrel{(8)}{\leq} (1 + \alpha)L^2\mathbb{E}[\|\hat{x}_k - x_k + x_k - x_{k-1} + x_{k-1} - \hat{x}_{k-1}\|^2] \\
&\quad + 2(1 + \alpha^{-1})\delta\mathbb{E}[\|\hat{x}_k - x^*\|^2 + \|\hat{x}_{k-1} - x^*\|^2] + 8(1 + \alpha^{-1})\sigma_*^2 \\
&\leq (1 + \alpha)L^2\mathbb{E}[\|(\gamma + \omega)F_{v_{k-1}}(\hat{x}_{k-1}) - \gamma F_{v_{k-2}}(\hat{x}_{k-2})\|^2] \\
&\quad + 4(1 + \alpha^{-1})\delta\mathbb{E}[\|x_k - x^*\|^2 + \|x_{k-1} - x^*\|^2] \\
&\quad + 4(1 + \alpha^{-1})\delta\gamma^2\mathbb{E}[\|F_{v_{k-1}}(\hat{x}_{k-1})\|^2 + \|F_{v_{k-2}}(\hat{x}_{k-2})\|^2] + 8(1 + \alpha^{-1})\sigma_*^2 \\
&= (1 + \alpha)L^2(\gamma + \omega)^2\mathbb{E}[\|F_{v_{k-1}}(\hat{x}_{k-1})\|^2] + (1 + \alpha)L^2\gamma^2\mathbb{E}[\|F_{v_{k-2}}(\hat{x}_{k-2})\|^2] \\
&\quad - 2(1 + \alpha)L^2\gamma(\gamma + \omega)\mathbb{E}[\langle F_{v_{k-1}}(\hat{x}_{k-1}), F_{v_{k-2}}(\hat{x}_{k-2}) \rangle] \\
&\quad + 4(1 + \alpha^{-1})\delta\mathbb{E}[\|x_k - x^*\|^2 + \|x_{k-1} - x^*\|^2] \\
&\quad + 4(1 + \alpha^{-1})\delta\gamma^2\mathbb{E}[\|F_{v_{k-1}}(\hat{x}_{k-1})\|^2 + \|F_{v_{k-2}}(\hat{x}_{k-2})\|^2] + 8(1 + \alpha^{-1})\sigma_*^2 \\
&= (1 + \alpha)L^2(\gamma + \omega)^2\mathbb{E}[\|F_{v_{k-1}}(\hat{x}_{k-1})\|^2] + (1 + \alpha)L^2\gamma^2\mathbb{E}[\|F_{v_{k-2}}(\hat{x}_{k-2})\|^2] \\
&\quad - (1 + \alpha)L^2\gamma(\gamma + \omega)\mathbb{E}[\|F_{v_{k-1}}(\hat{x}_{k-1})\|^2 + \|F_{v_{k-2}}(\hat{x}_{k-2})\|^2] \\
&\quad + (1 + \alpha)L^2\gamma(\gamma + \omega)\mathbb{E}[\|F_{v_{k-1}}(\hat{x}_{k-1}) - F_{v_{k-2}}(\hat{x}_{k-2})\|^2] \\
&\quad + 4(1 + \alpha^{-1})\delta\mathbb{E}[\|x_k - x^*\|^2 + \|x_{k-1} - x^*\|^2] \\
&\quad + 4(1 + \alpha^{-1})\delta\gamma^2\mathbb{E}[\|F_{v_{k-1}}(\hat{x}_{k-1})\|^2 + \|F_{v_{k-2}}(\hat{x}_{k-2})\|^2] + 8(1 + \alpha^{-1})\sigma_*^2 \\
&= (1 + \alpha)L^2\omega(\gamma + \omega)\mathbb{E}[\|F_{v_{k-1}}(\hat{x}_{k-1})\|^2] - (1 + \alpha)L^2\gamma\omega\mathbb{E}[\|F_{v_{k-2}}(\hat{x}_{k-2})\|^2] \\
&\quad + (1 + \alpha)L^2\gamma(\gamma + \omega)\mathbb{E}[\|F_{v_{k-1}}(\hat{x}_{k-1}) - F_{v_{k-2}}(\hat{x}_{k-2})\|^2] \\
&\quad + 4(1 + \alpha^{-1})\delta\mathbb{E}[\|x_k - x^*\|^2 + \|x_{k-1} - x^*\|^2] \\
&\quad + 4(1 + \alpha^{-1})\delta\gamma^2\mathbb{E}[\|F_{v_{k-1}}(\hat{x}_{k-1})\|^2 + \|F_{v_{k-2}}(\hat{x}_{k-2})\|^2] + 8(1 + \alpha^{-1})\sigma_*^2.
\end{aligned}$$

699 Since  $\hat{x}_0 = x_0$  and  $\hat{x}_1 = x_1 - \gamma F_{v_0}(x_0) = x_0 - (\gamma + \omega)F_{v_0}(x_0)$ , for  $k = 1$  we have

$$\begin{aligned}
\mathbb{E} [\|F_{v_1}(\hat{x}_1) - F_{v_0}(\hat{x}_0)\|^2] &= \mathbb{E} [\|F_{v_1}(\hat{x}_1) - F_{v_0}(x_0)\|^2] \\
&\leq (1 + \alpha)\mathbb{E} [\|F(\hat{x}_1) - F(x_0)\|^2] \\
&\quad + (1 + \alpha^{-1})\mathbb{E} [\|F_{v_1}(\hat{x}_1) - F(\hat{x}_1) - (F_{v_0}(x_0) - F(x_0))\|^2] \\
&\leq (1 + \alpha)L^2\mathbb{E} [\|\hat{x}_1 - x_0\|^2] \\
&\quad + 2(1 + \alpha^{-1})\mathbb{E} [\|F_{v_1}(\hat{x}_1) - F(\hat{x}_1)\|^2 + \|F_{v_0}(x_0) - F(x_0)\|^2] \\
&\stackrel{(8)}{\leq} (1 + \alpha)L^2(\gamma + \omega)^2\mathbb{E} [\|F_{v_0}(x_0)\|^2] \\
&\quad + 2(1 + \alpha^{-1})\delta\mathbb{E} [\|\hat{x}_1 - x^*\|^2 + \|x_0 - x^*\|^2] + 8(1 + \alpha)\sigma_*^2 \\
&\leq ((1 + \alpha)L^2 + 4(1 + \alpha^{-1})\delta)(\gamma + \omega)^2\mathbb{E} [\|F_{v_0}(x_0)\|^2] \\
&\quad + 6(1 + \alpha^{-1})\delta\|x_0 - x^*\|^2 + 8(1 + \alpha)\sigma_*^2.
\end{aligned}$$

700 Let  $\{w_k\}_{k=0}^{K-1}$  be a non-increasing sequence of positive numbers that will be specified later and

701  $W_K = \sum_{k=0}^{K-1} w_k$ . Summing up the above two inequalities with weights  $\{w_k\}_{k=1}^{K-1}$ , we derive

$$\begin{aligned}
\sum_{k=1}^{K-1} w_k \mathbb{E} [\|F_{v_k}(\hat{x}_k) - F_{v_{k-1}}(\hat{x}_{k-1})\|^2] &\leq (1 + \alpha)L^2 \sum_{k=1}^{K-3} (\omega(\gamma + \omega)w_{k+1} - \gamma\omega w_{k+2}) \mathbb{E} [\|F_{v_k}(\hat{x}_k)\|^2] \\
&\quad + (1 + \alpha)L^2\omega(\gamma + \omega)w_{K-1} \mathbb{E} [\|F_{v_{K-2}}(\hat{x}_{K-2})\|^2] \\
&\quad - (1 + \alpha)L^2\gamma\omega w_2 \mathbb{E} [\|F_{v_0}(x_0)\|^2] \\
&\quad + (1 + \alpha)L^2\gamma(\gamma + \omega) \sum_{k=1}^{K-2} w_{k+1} \mathbb{E} [\|F_{v_k}(\hat{x}_k) - F_{v_{k-1}}(\hat{x}_{k-1})\|^2] \\
&\quad + 4(1 + \alpha^{-1})\delta \sum_{k=2}^{K-1} w_k \mathbb{E} [\|x_k - x^*\|^2 + \|x_{k-1} - x^*\|^2] \\
&\quad + 4(1 + \alpha^{-1})\delta\gamma^2 \sum_{k=1}^{K-2} w_{k+1} \mathbb{E} [\|F_{v_k}(\hat{x}_k)\|^2 + \|F_{v_{k-1}}(\hat{x}_{k-1})\|^2] \\
&\quad + 8(1 + \alpha^{-1})(W_K - w_0 - w_1)\sigma_*^2 \\
&\quad + ((1 + \alpha)L^2 + 4(1 + \alpha^{-1})\delta)(\gamma + \omega)^2 w_1 \mathbb{E} [\|F_{v_0}(x_0)\|^2] \\
&\quad + 6(1 + \alpha^{-1})\delta w_1 \|x_0 - x^*\|^2 + 8(1 + \alpha)w_1 \sigma_*^2.
\end{aligned}$$

702 Next, we rearrange the terms using  $w_k \geq w_{k+1}$  and new notation  $\Delta_k =$

$$\begin{aligned}
703 \mathbb{E} [\|F_{v_k}(\hat{x}_k) - F_{v_{k-1}}(\hat{x}_{k-1})\|^2]: \\
(1 - (1 + \alpha)L^2\gamma(\gamma + \omega)) \sum_{k=1}^{K-1} w_k \Delta_k &\leq \sum_{k=1}^{K-2} ((1 + \alpha)L^2\omega(\gamma + \omega) + 8(1 + \alpha^{-1})\delta\gamma^2) w_k \mathbb{E} [\|F_{v_k}(\hat{x}_k)\|^2] \\
&\quad + ((1 + \alpha)L^2 + 8(1 + \alpha^{-1})\delta)(\gamma + \omega)^2 w_0 \mathbb{E} [\|F_{v_0}(x_0)\|^2] \\
&\quad + 12(1 + \alpha^{-1})\delta \sum_{k=1}^{K-1} w_k \mathbb{E} [\|x_k - x^*\|^2] + 8(1 + \alpha^{-1})(W_K - w_0)\sigma_*^2.
\end{aligned}$$

704 To simplify the above inequality we choose  $\alpha = \frac{1}{2L^2\gamma(\gamma + \omega)} - \frac{1}{2}$ , which is positive due to  $\gamma < 1/L$

705 and  $\gamma + \omega < 1/L$ . In this case, we have

$$\begin{aligned}
(1 + \alpha)L^2\gamma(\gamma + \omega) &= \frac{1}{2}L^2\gamma(\gamma + \omega) + \frac{1}{2}, \\
(1 + \alpha)L^2(\gamma + \omega)^2 &= \frac{1}{2}L^2(\gamma + \omega)^2 + \frac{\gamma + \omega}{2\gamma} \leq \frac{3}{2}, \\
(1 + \alpha)L^2\omega(\gamma + \omega) &= \frac{1}{2}L^2\omega(\gamma + \omega) + \frac{\omega}{2\gamma} = \frac{L\omega}{2} \left( L(\gamma + \omega) + \frac{1}{\gamma L} \right) \leq \frac{3L\omega}{2}, \\
1 + \alpha^{-1} &= 1 + \frac{2L^2\gamma(\gamma + \omega)}{1 - L^2\gamma(\gamma + \omega)} = \frac{1 + L^2\gamma(\gamma + \omega)}{1 - L^2\gamma(\gamma + \omega)} \leq \frac{2}{1 - L^2\gamma(\gamma + \omega)},
\end{aligned}$$

706 where we also use  $1/2L < \gamma < 1/L$  and  $\gamma + \omega < 1/L$ . Using these relations, we can continue our  
 707 derivation as follows:

$$\begin{aligned} \frac{1}{2} (1 - L^2\gamma(\gamma + \omega)) \sum_{k=1}^{K-1} w_k \Delta_k &\leq \sum_{k=1}^{K-2} \left( \frac{3L\omega}{2} + \frac{16}{1 - L^2\gamma(\gamma + \omega)} \delta \gamma^2 \right) w_k \mathbb{E} [\|F_{v_k}(\hat{x}_k)\|^2] \\ &\quad + \left( \frac{3}{2} + \frac{16}{1 - L^2\gamma(\gamma + \omega)} \delta (\gamma + \omega)^2 \right) w_0 \mathbb{E} [\|F_{v_0}(x_0)\|^2] \\ &\quad + \frac{24}{1 - L^2\gamma(\gamma + \omega)} \delta \sum_{k=1}^{K-1} w_k \mathbb{E} [\|x_k - x^*\|^2] + \frac{16}{1 - L^2\gamma(\gamma + \omega)} (W_K - w_0) \sigma_*^2. \end{aligned}$$

708 Dividing both sides by  $\frac{1}{2} (1 - L^2\gamma(\gamma + \omega))$ , we derive

$$\begin{aligned} \sum_{k=1}^{K-1} w_k \Delta_k &\leq \sum_{k=1}^{K-2} \left( \frac{3L\omega}{1 - L^2\gamma(\gamma + \omega)} + \frac{32}{(1 - L^2\gamma(\gamma + \omega))^2} \delta \gamma^2 \right) w_k \mathbb{E} [\|F_{v_k}(\hat{x}_k)\|^2] \\ &\quad + \left( \frac{3}{1 - L^2\gamma(\gamma + \omega)} + \frac{32}{(1 - L^2\gamma(\gamma + \omega))^2} \delta (\gamma + \omega)^2 \right) w_0 \mathbb{E} [\|F_{v_0}(x_0)\|^2] \\ &\quad + \frac{48}{(1 - L^2\gamma(\gamma + \omega))^2} \delta \sum_{k=1}^{K-1} w_k \mathbb{E} [\|x_k - x^*\|^2] + \frac{32}{(1 - L^2\gamma(\gamma + \omega))^2} (W_K - w_0) \sigma_*^2 \\ &= \sum_{k=1}^{K-2} C_1 w_k \mathbb{E} [\|F_{v_k}(\hat{x}_k)\|^2] + C_2 w_0 \mathbb{E} [\|F_{v_0}(x_0)\|^2] \\ &\quad + 3C_3 \delta \sum_{k=1}^{K-1} w_k \mathbb{E} [\|x_k - x^*\|^2] + 2C_3 W_K \sigma_*^2, \end{aligned} \tag{45}$$

709 where  $C_1 = \frac{3L\omega}{1 - L^2\gamma(\gamma + \omega)} + \frac{32}{(1 - L^2\gamma(\gamma + \omega))^2} \delta \gamma^2$ ,  $C_2 = \frac{3}{1 - L^2\gamma(\gamma + \omega)} + \frac{32}{(1 - L^2\gamma(\gamma + \omega))^2} \delta (\gamma + \omega)^2$ ,  
 710 and  $C_3 = \frac{16}{(1 - L^2\gamma(\gamma + \omega))^2}$ . Summing up inequalities (43) for  $k = 1, \dots, K - 1$  with weights  
 711  $w_1, \dots, w_{K-1}$  and (44) with weight  $w_0$ , we get

$$\begin{aligned} \sum_{k=0}^{K-1} w_k \mathbb{E} [\|x_{k+1} - x^*\|^2] &\leq \sum_{k=0}^{K-1} w_k \mathbb{E} [\|x_k - x^*\|^2] - \omega \gamma \sum_{k=1}^{K-1} w_k \mathbb{E} [\|F_{v_{k-1}}(\hat{x}_{k-1})\|^2] \\ &\quad + \omega \gamma \sum_{k=1}^{K-1} w_k \Delta_k + \omega(\omega + 2\rho) w_0 \mathbb{E} [\|F_{v_0}(x_0)\|^2]. \end{aligned}$$

712 Since  $w_k \geq w_{k+1}$ , we can continue the derivation as follows:

$$\begin{aligned} \sum_{k=0}^{K-1} w_k \mathbb{E} [\|x_{k+1} - x^*\|^2] &\leq \sum_{k=0}^{K-1} w_k \mathbb{E} [\|x_k - x^*\|^2] - \omega \gamma \sum_{k=0}^{K-2} w_k \mathbb{E} [\|F_{v_k}(\hat{x}_k)\|^2] \\ &\quad + \omega \gamma \sum_{k=1}^{K-1} w_k \Delta_k + \omega(\omega + 2\rho) w_0 \mathbb{E} [\|F_{v_0}(x_0)\|^2] \\ &\stackrel{(45)}{\leq} \sum_{k=0}^{K-1} (1 + 3C_3 \omega \gamma \delta) w_k \mathbb{E} [\|x_k - x^*\|^2] - \omega \gamma (1 - C_1) \sum_{k=0}^{K-2} w_k \mathbb{E} [\|F_{v_k}(\hat{x}_k)\|^2] \\ &\quad + 2\omega \gamma C_2 w_0 \mathbb{E} [\|F_{v_0}(x_0)\|^2] + 2\omega \gamma C_3 W_K \sigma_*^2. \end{aligned}$$

Now we need to specify the weights  $w_{-1}, w_0, w_1, \dots, w_{K-1}$ . Let  $w_{K-2} = 1$  and  $w_{k-1} = (1 + 3C_3\omega\gamma\delta)w_k$ . Then, rearranging the terms, dividing both sides by  $\omega\gamma(1 - C_1)W_{K-1}$ , we get

$$\begin{aligned}
\min_{0 \leq k \leq K-1} \mathbb{E} [\|F(\hat{x}_k)\|^2] &\leq \min_{0 \leq k \leq K-1} \mathbb{E} [\|F_{v_k}(\hat{x}_k)\|^2] \\
&\leq \sum_{k=0}^{K-2} \frac{w_k}{W_{K-1}} \mathbb{E} [\|F_{v_k}(\hat{x}_k)\|^2] \\
&\leq \frac{1}{\omega\gamma(1 - C_1)W_{K-1}} \sum_{k=0}^{K-1} (w_{k-1} \mathbb{E} [\|x_k - x^*\|^2] - w_k \mathbb{E} [\|x_{k+1} - x^*\|^2]) \\
&\quad + \frac{2C_2w_0 \mathbb{E} [\|F_{v_0}(\hat{x}_0)\|^2]}{(1 - C_1)W_{K-1}} + \frac{2C_3W_K\sigma_*^2}{(1 - C_1)W_{K-1}} \\
&\leq \frac{w_{-1}\|x_0 - x^*\|^2}{\omega\gamma(1 - C_1)W_{K-1}} + \frac{2C_2w_0 \mathbb{E} [\|F_{v_0}(\hat{x}_0)\|^2]}{(1 - C_1)W_{K-1}} + \frac{2C_3W_K\sigma_*^2}{(1 - C_1)W_{K-1}}.
\end{aligned}$$

It remains to simplify the right-hand side of the above inequality. First, we notice that  $W_{K-1} = \sum_{k=0}^{K-2} w_k \geq (K-1)w_{K-2} = K-1$  since  $w_k \geq w_{k+1}$ . Moreover,  $w_{-1} = (1 + 3C_3\omega\gamma\delta)^{K-1}$ . Next,

$$\begin{aligned}
C_1 &= \frac{3L\omega}{1 - L^2\gamma(\gamma + \omega)} + \frac{32}{(1 - L^2\gamma(\gamma + \omega))^2} \delta\gamma^2 \\
&\leq \frac{3L\omega}{1 - L\gamma} + \frac{32}{(1 - L\gamma)^2} \cdot \frac{(1 - L\gamma)L^3\omega}{32} \cdot \gamma^2 \leq \frac{4L\omega}{1 - L\gamma}, \\
C_2 &= \frac{3}{1 - L^2\gamma(\gamma + \omega)} + \frac{32}{(1 - L^2\gamma(\gamma + \omega))^2} \delta(\gamma + \omega)^2 \\
&\leq \frac{3}{1 - L\gamma} + \frac{32}{(1 - L\gamma)^2} \cdot \frac{(1 - L\gamma)L^3\omega}{32} \cdot (\gamma + \omega)^2 \leq \frac{4}{1 - L\gamma}, \\
C_3 &= \frac{16}{(1 - L^2\gamma(\gamma + \omega))^2} \leq \frac{16}{(1 - L\gamma)^2},
\end{aligned}$$

where we use  $\delta \leq (1 - L\gamma)L^3\omega/16$  and  $\gamma + \omega < 1/L$ . Using these inequalities, we simplify the bound as follows:

$$\begin{aligned}
\min_{0 \leq k \leq K-1} \mathbb{E} [\|F(\hat{x}_k)\|^2] &\leq \frac{(1 - L\gamma)(1 + 3C_3\omega\gamma\delta)^{K-1}\|x_0 - x^*\|^2}{\omega\gamma(1 - L(\gamma + 4\omega))(K-1)} + \frac{8(1 + 3C_3\omega\gamma\delta)^{K-2} \mathbb{E} [\|F_{v_0}(\hat{x}_0)\|^2]}{(1 - L(\gamma + 4\omega))(K-1)} \\
&\quad + \frac{32\sigma_*^2}{(1 - L\gamma)(1 - L(\gamma + 4\omega))} \\
&\leq \frac{(1 - L\gamma) \left(1 + \frac{48\omega\gamma\delta}{(1 - L\gamma)^2}\right)^{K-1} \|x_0 - x^*\|^2}{\omega\gamma(1 - L(\gamma + 4\omega))(K-1)} + \frac{8 \left(1 + \frac{48\omega\gamma\delta}{(1 - L\gamma)^2}\right)^{K-2} \mathbb{E} [\|F_{v_0}(\hat{x}_0)\|^2]}{(1 - L(\gamma + 4\omega))(K-1)} \\
&\quad + \frac{32\sigma_*^2}{(1 - L\gamma)(1 - L(\gamma + 4\omega))} \tag{46}
\end{aligned}$$

where we use  $W_K = W_{K-1} + w_{K-1} \leq W_{K-1} + w_{K-2} \leq 2W_{K-1}$ . Finally, we use (8) to upper-bound  $\mathbb{E} [\|F_{v_0}(\hat{x}_0)\|^2]$ :

$$\begin{aligned}
\mathbb{E} [\|F_{v_0}(\hat{x}_0)\|^2] &= \mathbb{E} [\|F_{v_0}(x_0)\|^2] \stackrel{(8)}{\leq} \delta\|x_0 - x^*\|^2 + \|F(x_0)\|^2 + 2\sigma_*^2 \\
&\leq (\delta + L^2)\|x_0 - x^*\|^2 + 2\sigma_*^2.
\end{aligned}$$

Plugging this inequality in (46), we derive

$$\begin{aligned}
\min_{0 \leq k \leq K-1} \mathbb{E} [\|F(\hat{x}_k)\|^2] &\leq \frac{(1 + 8\omega\gamma(\delta + L^2) - L\gamma) \left(1 + \frac{48\omega\gamma\delta}{(1 - L\gamma)^2}\right)^{K-1} \|x_0 - x^*\|^2}{\omega\gamma(1 - L(\gamma + 4\omega))(K-1)} \\
&\quad + \frac{4 \left(8 + \frac{1 - L\gamma}{K-1} \left(1 + \frac{48\omega\gamma\delta}{(1 - L\gamma)^2}\right)^{K-1}\right) \sigma_*^2}{(1 - L\gamma)(1 - L(\gamma + 4\omega))},
\end{aligned}$$

which concludes the proof.  $\square$

**Theorem E.5.** Let  $F$  be  $L$ -Lipschitz and satisfy Weak Minty condition with parameter  $\rho < 1/(2L)$ . Assume that inequality (8) holds (e.g., it holds whenever Assumption 3.1 holds, see Lemma 3.2). Assume that  $\gamma_k = \gamma$ ,  $\omega_k = \omega$  and

$$\max \left\{ 2\rho, \frac{1}{2L} \right\} < \gamma < \frac{1}{L}, \quad 0 < \omega < \min \left\{ \gamma - 2\rho, \frac{1}{4L} - \frac{\gamma}{4} \right\}.$$

Then, for all  $K \geq 2$  the iterates produced by mini-batched SPEG with batch-size

$$\tau \geq \max \left\{ 1, \frac{32\delta}{(1-L\gamma)L^3\omega}, \frac{48\omega\gamma\delta(K-1)}{(1-L\gamma)^2}, \frac{2\omega\gamma\sigma_*^2(K-1)}{(1-L\gamma)\|x_0 - x^*\|^2} \right\} \quad (47)$$

satisfy

$$\min_{0 \leq k \leq K-1} \mathbb{E} [\|F(\hat{x}_k)\|^2] \leq \frac{48\|x_0 - x^*\|^2}{\omega\gamma(1-L(\gamma+4\omega))(K-1)}. \quad (48)$$

725 *Proof.* Mini-batched SPEG uses estimator

$$F_{v_k}(\hat{x}_k) = \frac{1}{\tau} \sum_{i=1}^{\tau} F_{v_{k,i}}(\hat{x}_k),$$

726 where  $F_{v_{k,1}}(\hat{x}_k), \dots, F_{v_{k,\tau}}(\hat{x}_k)$  are independent samples satisfying (8) with parameters  $\delta$  and  $\sigma_*^2$ .

727 Using variance decomposition and independence of  $F_{v_{k,1}}(\hat{x}_k), \dots, F_{v_{k,\tau}}(\hat{x}_k)$ , we get

$$\begin{aligned} \mathbb{E}_{v_k} [\|F_{v_k}(\hat{x}_k)\|^2] &= \mathbb{E}_{v_k} [\|F_{v_k}(\hat{x}_k) - F(\hat{x}_k)\|^2] + \|F(\hat{x}_k)\|^2 \\ &= \mathbb{E}_{v_k} \left[ \left\| \frac{1}{\tau} \sum_{i=1}^{\tau} (F_{v_{k,i}}(\hat{x}_k) - F(\hat{x}_k)) \right\|^2 \right] + \|F(\hat{x}_k)\|^2 \\ &= \frac{1}{\tau^2} \sum_{i=1}^{\tau} \mathbb{E}_{v_k} [\|F_{v_{k,i}}(\hat{x}_k) - F(\hat{x}_k)\|^2] + \|F(\hat{x}_k)\|^2 \\ &\stackrel{(8)}{\leq} \frac{\delta}{\tau} \|\hat{x}_k - x^*\|^2 + \|F(\hat{x}_k)\|^2 + \frac{2\sigma_*^2}{\tau}. \end{aligned}$$

728 That is, mini-batched estimator  $F_{v_k}(\hat{x}_k)$  satisfies (8) with parameters  $\delta/\tau$  and  $\sigma_*^2/\tau$ . Therefore,  
729 Theorem E.4 implies

$$\begin{aligned} \min_{0 \leq k \leq K-1} \mathbb{E} [\|F(\hat{x}_k)\|^2] &\leq \frac{(1 + 4\omega\gamma(\frac{\delta}{\tau} + L^2) - L\gamma) \left(1 + \frac{48\omega\gamma\delta}{(1-L\gamma)^2\tau}\right)^{K-1} \|x_0 - x^*\|^2}{\omega\gamma(1-L(\gamma+4\omega))(K-1)} \\ &\quad + \frac{8 \left(8 + \frac{1-L\gamma}{K-1} \left(1 + \frac{48\omega\gamma\delta}{(1-L\gamma)^2\tau}\right)^{K-1}\right) \sigma_*^2}{(1-L\gamma)(1-L(\gamma+4\omega))\tau}. \end{aligned} \quad (49)$$

730 Since  $\tau$  satisfies (47) and  $\gamma \leq 1/L$ ,  $\omega \leq 1/4L$ , we have

$$\begin{aligned} 4\omega\gamma \left( \frac{\delta}{\tau} + L^2 \right) &\leq \frac{1}{4L^2} \left( \delta \cdot \frac{(1-L\gamma)L^3\omega}{16\delta} + L^2 \right) \leq 1, \\ \left( 1 + \frac{48\omega\gamma\delta}{(1-L\gamma)^2\tau} \right)^{K-1} &\leq \left( 1 + \frac{48\omega\gamma\delta}{(1-L\gamma)^2} \cdot \frac{(1-L\gamma)^2}{48\omega\gamma\delta(K-1)} \right)^{K-1} = \left( 1 + \frac{1}{K-1} \right)^{K-1} \leq \exp(1) < 3. \end{aligned}$$

731 Using this, we can simplify (49) as follows:

$$\begin{aligned}
\min_{0 \leq k \leq K-1} \mathbb{E} [\|F(\hat{x}_k)\|^2] &\leq \frac{6\|x_0 - x^*\|^2}{\omega\gamma(1-L(\gamma+4\omega))(K-1)} + \frac{88\sigma_*^2}{(1-L\gamma)(1-L(\gamma+4\omega))\tau} \\
&\stackrel{(47)}{\leq} \frac{6\|x_0 - x^*\|^2}{\omega\gamma(1-L(\gamma+4\omega))(K-1)} + \frac{88\sigma_*^2}{(1-L\gamma)(1-L(\gamma+4\omega))} \cdot \frac{(1-L\gamma)\|x_0 - x^*\|^2}{2\omega\gamma\sigma_*^2} \\
&= \frac{48\|x_0 - x^*\|^2}{\omega\gamma(1-L(\gamma+4\omega))(K-1)}.
\end{aligned}$$

732 This concludes the proof.  $\square$

## 733 F Further Results on Arbitrary Sampling

### 734 F.1 Proof of Proposition 5.1

735 Expanding the left hand side of Expected Residual (ER) condition we have

$$\begin{aligned}
\mathbb{E}\|(F_v(x) - F_v(x^*)) - (F(x) - F(x^*))\|^2 &\stackrel{(25)}{=} \mathbb{E}\|(F_v(x) - F_v(x^*))\|^2 - \|F(x) - F(x^*)\|^2 \\
&\leq \mathbb{E}\|F_v(x) - F_v(x^*)\|^2. \tag{50}
\end{aligned}$$

736 For any  $x$  and  $y$  with  $v_i = \frac{1}{p_i}$  we obtain

$$\begin{aligned}
\|F_v(x) - F_v(y)\|^2 &= \frac{1}{n^2} \left\| \sum_{i \in S} \frac{1}{p_i} (F_i(x) - F_i(y)) \right\|^2 \\
&= \sum_{i,j \in S} \left\langle \frac{1}{np_i} (F_i(x) - F_i(y)), \frac{1}{np_j} (F_j(x) - F_j(y)) \right\rangle.
\end{aligned}$$

737 Then taking expectation on both sides we get

$$\begin{aligned}
\mathbb{E}\|F_v(x) - F_v(y)\|^2 &= \sum_C p_C \sum_{i,j \in C} \left\langle \frac{1}{np_i} (F_i(x) - F_i(y)), \frac{1}{np_j} (F_j(x) - F_j(y)) \right\rangle \\
&= \sum_{i,j=1}^n \sum_{C: i,j \in C} p_C \left\langle \frac{1}{np_i} (F_i(x) - F_i(y)), \frac{1}{np_j} (F_j(x) - F_j(y)) \right\rangle \\
&= \sum_{i,j=1}^n \frac{P_{ij}}{p_i p_j} \left\langle \frac{1}{n} (F_i(x) - F_i(y)), \frac{1}{n} (F_j(x) - F_j(y)) \right\rangle.
\end{aligned}$$

738 Now we consider the case, where the ratio  $\frac{P_{ij}}{p_i p_j} = c_2$  i.e. constant for  $i \neq j$  and  $P_{ii} = p_i$ . Then from  
739 the above computations we derive

$$\begin{aligned}
\mathbb{E}\|F_v(x) - F_v(y)\|^2 &= \sum_{i \neq j}^n c_2 \left\langle \frac{1}{n} (F_i(x) - F_i(y)), \frac{1}{n} (F_i(x) - F_i(y)) \right\rangle + \sum_{i=1}^n \frac{1}{n^2 p_i} \|F_i(x) - F_i(y)\|^2 \\
&= \sum_{i,j=1}^n c_2 \left\langle \frac{1}{n} (F_i(x) - F_i(y)), \frac{1}{n} (F_i(x) - F_i(y)) \right\rangle + \sum_{i=1}^n \frac{1-p_i c_2}{n^2 p_i} \|F_i(x) - F_i(y)\|^2 \\
&\stackrel{(19)}{\leq} c_2 \|F(x) - F(y)\|^2 + \sum_{i=1}^n \frac{1-p_i c_2}{n^2 p_i} L_i^2 \|x - y\|^2 \\
&\stackrel{(18)}{\leq} \left( c_2 L^2 + \frac{1}{n^2} \sum_{i=1}^n \frac{1-p_i c_2}{p_i} L_i^2 \right) \|x - y\|^2.
\end{aligned}$$

740 Thus replacing  $y = x^*$  and combining with (50) we get the following bound on the Expected  
741 Residual:

$$\mathbb{E}\|(F_v(x) - F_v(x^*)) - (F(x) - F(x^*))\|^2 \leq \left( c_2 L^2 + \frac{1}{n^2} \sum_{i=1}^n \frac{1-p_i c_2}{p_i} L_i^2 \right) \|x - x^*\|^2. \tag{51}$$



For single-element sampling  $c_2 = 0$  (as probability of two points appearing in same sample is zero for single element sampling i.e.  $P_{ij} = 0$ ). Then we obtain

$$\delta \leq \frac{2}{n^2} \sum_{i=1}^n \frac{L_i^2}{p_i}$$

742 from (51). This completes the derivation of  $\delta$  for single element sampling. To compute  $\sigma_*^2$  for single  
743 element sampling, we replace

$$P_{ij} = \begin{cases} p_i & \text{if } i = j \\ 0 & \text{otherwise} \end{cases}$$

744 in (30) to get

$$\sigma_*^2 = \frac{1}{n^2} \sum_{i=1}^n \frac{1}{p_i} \|F_i(x^*)\|^2.$$

## G Numerical Experiments

In Appendix G.1, we add more details on the experiments discussed in the main paper. Furthermore, in Appendix G.2, we run more experiments to evaluate the performance of SPEG on quasi-strongly monotone and weak MVI problems.

### G.1 More Details on the Numerical Experiments of Section 6

**On the Data Generation Process of Section 6.1.** In our experiments, we run SPEG on quadratic games of the form  $\min_{x \in \mathbb{R}^d} \max_{y \in \mathbb{R}^d} \frac{1}{n} \sum_{i=1}^n f_i(x, y)$  where

$$f_i(x, y) := \frac{1}{2} x^\top A_i x + x^\top B_i y - \frac{1}{2} y^\top C_i y + a_i^\top x - c_i^\top y$$

where  $A_i, B_i, C_i$  are generated such that the quadratic game is strongly monotone and smooth. In all our experiments, we take  $n = 100$  and  $d = 30$ . We generate positive semi-definite matrices  $A_i, B_i, C_i$  such that their eigenvalues lie in the interval  $[\mu_A, L_A], [\mu_B, L_B]$  and  $[\mu_C, L_C]$  respectively. In all our experiments, we consider  $L_A = L_B = L_C = 1$  and  $\mu_A = \mu_C = 0.1, \mu_B = 0$  unless otherwise mentioned. The vectors  $a_i$  and  $c_i$  are generated from  $\mathcal{N}_d(0, I_d)$ . Here the  $i$ th operator is given by

$$F_i \begin{pmatrix} x \\ y \end{pmatrix} = \begin{pmatrix} \nabla_x f_i(x, y) \\ -\nabla_y f_i(x, y) \end{pmatrix} = \begin{pmatrix} A_i x + B_i y + a_i \\ C_i y - B_i^\top x + c_i \end{pmatrix} \quad (52)$$

**On Constant vs Switching Step-size Rule.** We run the experiments on two synthetic datasets. In Fig. 1a of the main paper, we take  $\mu_A = \mu_C = 0.6$ . Here we include one more plot with a similar flavor but in a different setting. For Fig. 3a, we generate the data such that eigenvalues of  $A_1, B_1, C_1$  are generated uniformly from the interval  $[0.1, 10]$ . In the new plot, similar to the main paper, we can see the benefit of switching the step-size rule of Theorem 4.3.

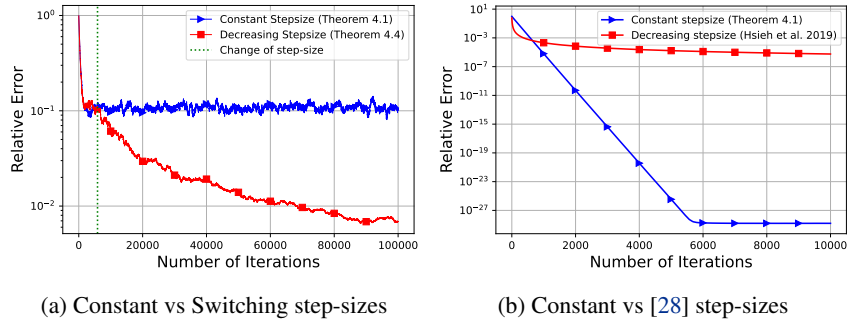

Figure 3: Experiments on strongly monotone quadratic games. In Fig. 3a we compare the constant step-size rule (9) with the switching step-sizes (11) while in Fig. 3b, we compare constant step-size rule with step-size from [28].

**On Comparison with Hsieh et al. [28]:** To implement SPEG with the stepsizes from Hsieh et al. [28], we choose  $\gamma$  and  $b$  such that  $\frac{1}{\mu} < \gamma \leq \frac{b}{4L}$  and set  $\omega_k = \gamma_k = \frac{\gamma}{k+b}$ . For Fig. 3b, we generate  $A_i, B_i, C_i$  as described above. Then we sample optimal points  $x^*, y^*$  first from  $\mathcal{N}_d(0, I_d)$  and then generate  $a_i, c_i$  such that  $F(x^*, y^*) = 0$ .

$$\begin{pmatrix} a_i \\ c_i \end{pmatrix} = \begin{pmatrix} A_i & B_i \\ -B_i^\top & C_i \end{pmatrix}^{-1} \begin{pmatrix} x^* \\ y^* \end{pmatrix}$$

In Fig. 3b, we run the algorithms on interpolated model ( $F_i(x^*) = 0$  for all  $i \in [n]$ ). Since the model is interpolated, we have  $\sigma_*^2 = 0$  in Theorem 4.1 and linear convergence to the exact optimum asymptotically.

770 **On Uniform vs Importance Sampling.** Following the corresponding experiment in the main paper  
 771 on the comparison of uniform vs importance sampling, in Fig 4 we illustrate how the trajectories  
 772 under uniform sampling get worse while the trajectory under importance sampling remains almost  
 773 identical when we increase  $\Lambda$ . Recall that in this setting, the eigenvalues of  $A_1, C_1$  are uniformly  
 774 generated from the interval  $[0.1, \Lambda]$ .

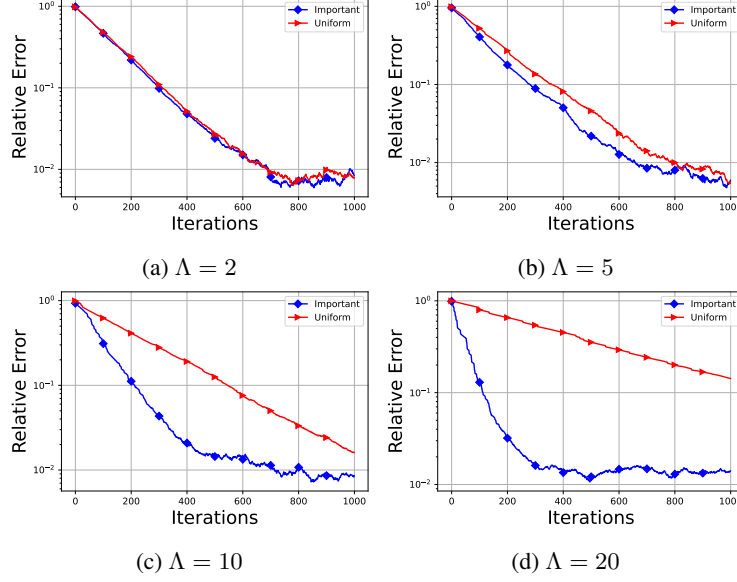

Figure 4: Comparison of SPEG with Uniform and Importance Sampling for different  $\Lambda \in \{2, 5, 10, 20\}$ , where the eigenvalues of matrices  $A_1, C_1$  are uniformly generated from the interval  $[0.1, \Lambda]$ .

775 **On Weak Minty VIPs.** In this experiment, we generate  $\xi_i, \zeta_i$  such that  $\frac{1}{n} \sum_{i=1}^n \xi_i = \sqrt{63}$  and  
 776  $\frac{1}{n} \sum_{i=1}^n \zeta_i = -1$ . This choice of  $\xi_i, \zeta_i$  ensures that  $L = 8$  and  $\rho = 1/32$  for the min-max problem  
 777 we considered in Section 6.2. In Fig. 5, we again implement the SPEG on (17) with batchsize =  
 $0.15 \times n$  (different batchsize compare to the plot of the main paper).

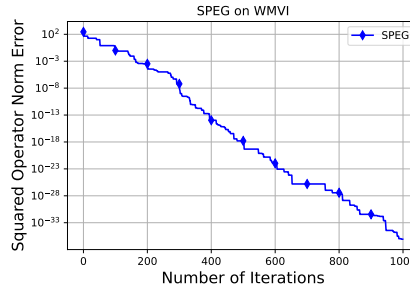

Figure 5: Trajectory of SPEG for solving weak MVI using a batchsize =  $0.15 \times n$ .

778

## 779 G.2 Additional Experiments

780 In this subsection, we include more experiments to evaluate the performance of SPEG on quasi-  
 781 strongly monotone and weak MVI problems. First, we run the experiment comparing constant and  
 782 switching step-size rules on a different setup than the one we included in the main paper to analyze  
 783 the performance of SPEG under different condition numbers. Then, we implement SPEG on the  
 784 weak MVI of (17). To evaluate the performance in this experiment, we plot  $\|F(\hat{x}_k)\|^2 / \|F(x_0)\|^2$  on the  
 785  $y$ -axis.

### 786 G.2.1 Strongly Monotone Quadratic Game:

787 In this experiment, we compare the proposed constant step-size (9) and the switching step-size  
788 rule (11). We implement our algorithm on operator  $F : \mathbb{R}^4 \rightarrow \mathbb{R}^4$  given by

$$F(x) := \frac{1}{3} (M_1(x - x_1^*) + M_2(x - x_2^*) + M_3(x - x_3^*)),$$

789 where  $M_1, M_2$  and  $M_3$  are the diagonal matrices,

$$M_1 = \begin{pmatrix} \Delta & & & \\ & 1 & & \\ & & 1 & \\ & & & 1 \end{pmatrix}, \quad M_2 = \begin{pmatrix} 1 & & & \\ & \Delta & & \\ & & 1 & \\ & & & 1 \end{pmatrix}, \quad M_3 = \begin{pmatrix} 1 & & & \\ & 1 & & \\ & & \Delta & \\ & & & 1 \end{pmatrix}$$

790 and

$$x_1^* = \begin{pmatrix} \Delta \\ 0 \\ 0 \\ 0 \end{pmatrix}, \quad x_2^* = \begin{pmatrix} 0 \\ \Delta \\ 0 \\ 0 \end{pmatrix}, \quad x_3^* = \begin{pmatrix} 0 \\ 0 \\ \Delta \\ 0 \end{pmatrix}.$$

791 This choice of  $M_i$  and  $x_i^*$  ensures that the Lipschitz constant of operator  $F$  is  $\frac{\Delta+2}{3}$  while quasi-strong  
792 monotonicity parameter (3) is  $\mu = 1$ . Hence the condition number of  $F$  is given by  $\frac{\Delta+2}{3}$ . This allows  
793 us to vary the condition number of operator  $F$  by changing the value of  $\Delta$ . For Fig. 6a we take  $\Delta = 3$   
794 (condition number = 1.67) while for Fig. 6b we choose  $\Delta = 10$  (condition number = 10.67). The  
795 vertical dotted line in plots of Fig. 6 marks the transition point from constant to switching step-size  
796 rule as predicted by our theoretical result in Theorem 4.3.

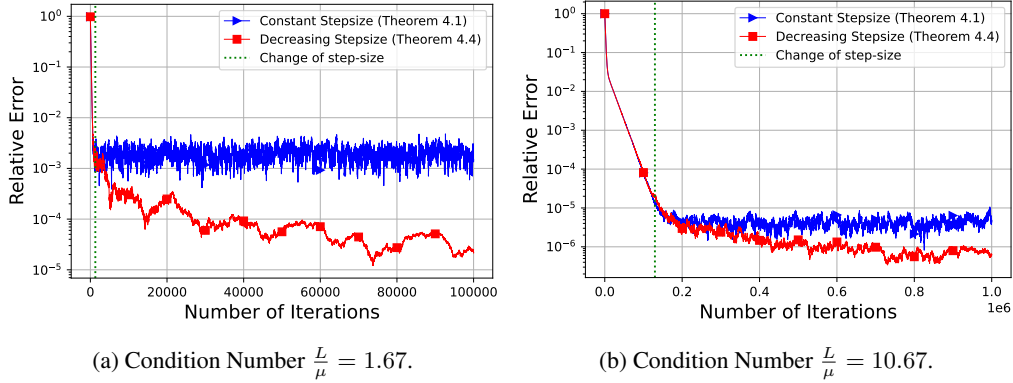

Figure 6: Illustration of switching rule (11) in Theorem 4.3. The dotted line marks the transition from phase 1 (where we use constant step-size) to phase 2 (where we use decreasing step-size).

### 797 G.2.2 Weak Minty VIPs Continued

798 In this experiment, we reevaluate the performance of SPEG on weak MVI example of (17). That  
799 is, we generate the data in exactly the same way as the ones in section 6.2 with  $n = 100$ . In Fig. 7a  
800 and 7b, we implement SPEG with batchsize 10 and 15, respectively (we note that in this setting the  
801 full-gradient evaluation requires a batchsize of 100). For these plots, we use the relative operator  
802 norm on the  $y$ -axis, i.e.  $\|F(\hat{x}_k)\|^2 / \|F(x_0)\|^2$ , where  $x_0$  denotes the starting point of SPEG. As expected,  
803 the plots illustrate that SPEG performs better as we increase the batchsize. From Fig. 7 it is clear  
804 that with batchsize 15 SPEG reaches an accuracy close to  $10^{-10}$  while when we use a batchsize of  
805 10 for the same number of iterations we are only able to converge to an accuracy of  $10^{-4}$ .

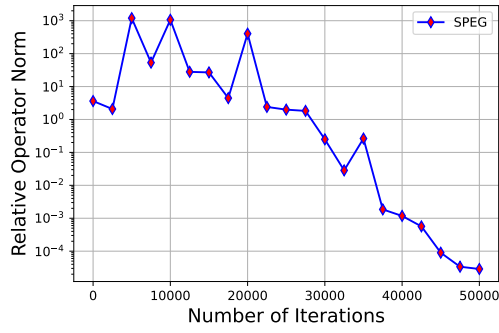

(a) Batchsize =  $0.1 \times n$ .

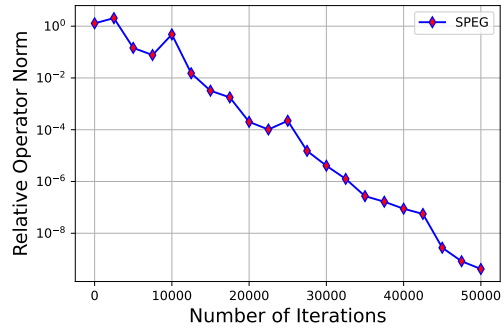

(b) Batchsize =  $0.15 \times n$ .

Figure 7: Performance of SPEG for solving weak MVI with different batchsizes. In plot (a) we use a batchsize of 10 while in plot (b) we use 15.
